# Supplementary material for: Characterization of antimicrobial-resistant Gram-negative bacteria that cause neonatal sepsis in seven low- and middle-income countries
Source: PubMed Central journal article supplement (PMC8007471; doi:10.1038/s41564-021-00870-7), 2021-03-29
Supplement: 41564_2021_870_MOESM1_ESM.pdf [file 41564_2021_870_MOESM1_ESM.pdf]

---

**Supplementary information**

---

**Characterization of antimicrobial-resistant Gram-negative bacteria that cause neonatal sepsis in seven low- and middle-income countries**

---

In the format provided by the authors and unedited

## Clinical Case Definitions for Severe Bacterial Infection (SBI) and Sepsis at Birth

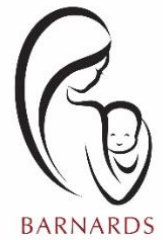

### During the neonatal period (0-28 days):

Significant **Risk Factors** at Birth:

1. PROM  $\geq$  18 hours
2. Maternal fever (axillary temp  $>37.5$ ) at delivery time.
3. Perinatal asphyxia (APGAR  $\leq 5$  at 5 Minutes)
4. Foul smelling amniotic fluid
5. Very low birth weight ( $<1500g$ )
6. Difficult birth (dystocia)
7. Infected twin
8. Leukorrhoea or untreated urinary tract infection during pregnancy.
9. Home birth

Significant **signs/symptoms**: **A**=very common. **B**=less common sign of severe bacterial infection/ sepsis

1. Difficulty or refusal to suckle (A)
2. Acute crying, irritability (B)
3. Drowsiness, slow reaction times, hypotonia, coma (A)
4. Bulging fontanelle (A)
5. Convulsions (A)
6. Periumbilical erythema (A)
7. Respiratory rate  $> 60/min$  (B)
8. Apnea ( $>15s$ ) or bradypnea (respiratory rate  $<20/min$ ) (A)
9. Hypothermia ( $<35.5C$ )/ fever (axillary temperature  $>37.5C$ ) (A)
10. Purulent discharge from the eyes (A)
11. Hepatosplenomegaly (B)
12. Crepitations/crackles on pulmonary auscultation (A)
13. Jaundice (B)
14. Numerous skin pustules (B)

Criteria Useable by healthcare agents  $\rightarrow$  hospitalization for medical evaluation:

**1 RISK FACTOR + 1 (A) sign OR**

**1 RISK FACTOR + 2 (B) signs**

### **Criteria for suspected infection after the age of 28 days (for BARNARDS up to 60 days)**

1. Difficulty or refusal to suckle B
2. Acute crying/irritability B
3. Drowsiness, slow reaction time, hypotonia, coma. A
4. Bulging fontanelle A
5. Convulsions A
6. Respiratory frequency  $> 60$  B
7. Apnoea ( $>15sec$ ) or bradypnoea (respiratory rate  $<20$ ) B
8. Hypothermia ( $<35.5.C$ ) alternating with fever ( $>37.5.C$ ) B
9. Purulent otorrhoea A
10. Purulent ocular discharge B
11. Periumbilical erythema A
12. Diarrhoea/vomiting B

Any baby with **1 category A sign OR 2 category B signs OR 1 category B sign +1 category A sign** will be admitted and investigated for severe infection.

## Appendix 2: Microbiology Standard Operating Procedure

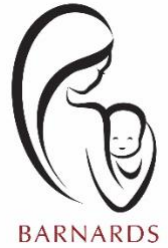

This appendix is designed to provide a standard operating procedure for the taking, storage and rectal and blood samples. Also procedures for shipment of rectal samples is provided.

### Appendix M1. Sampling of Normal Flora

The mothers admitted to the birthing centre/hospital will have rectal swabs taken prior to delivery, follow the procedure detailed in '1. Procedure for collection of rectal samples'. If the baby has a normal delivery and does NOT present signs of a severe bacterial infection or sepsis (see Appendix W for definitions of Early Onset Sepsis – EOS – and Late Onset Sepsis - LOS) they will represent the control group and no further sampling is required.

If the baby stays in hospital and contracts a severe bacterial infection or sepsis or goes home and is admitted at a later date presenting with signs of sepsis (LOS) rectal samples should be taken as described in '1. Procedure for collection of rectal samples'. All results should be automatically recorded on the spreadsheet (Appendix S).

### Appendix M1: Microbiology and Processing of Rectal Swabs

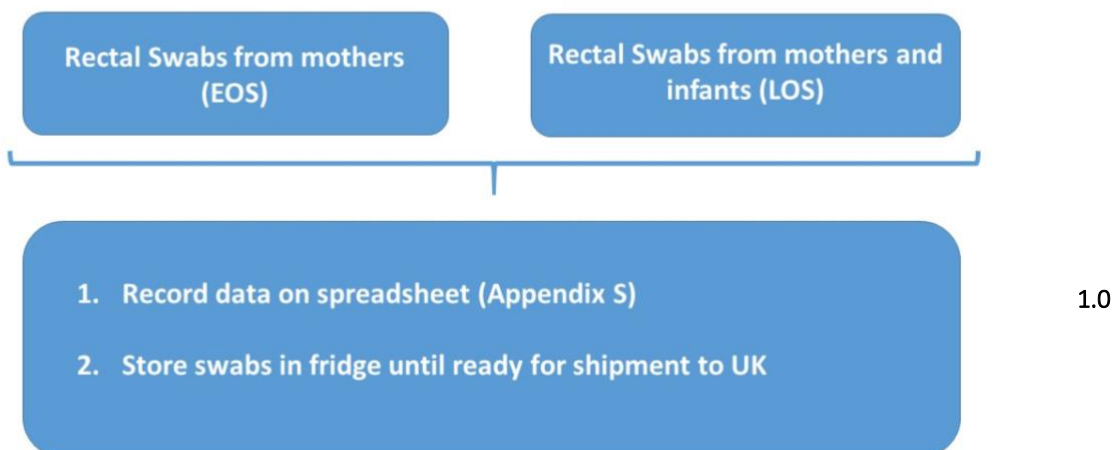

#### Procedure for collection of rectal samples:

- 1.1 Label each swab as per instructions in 'Appendix L: Labelling', in addition please add DOB and name with a waterproof marker / pen.
- 1.2 Moisten the swab in the appropriate transport media.
- 1.3 Insert swab 2.5cm into rectum and gently rotate.
- 1.4 Place the swab into the same tube deep enough that medium covers the cotton tips.
- 1.5 Seal tubes with Sellotape and place the samples in sealed, waterproof containers (i.e., plastic bags). Refrigerate at 4°C.
- 1.6 Shipment will be via containers UN3373 and sent using a reliable courier, organised locally.
- 1.7 It is important that every time a shipment of samples is sent to the UK, an electronic list of samples is emailed to [miltonr1@cardiff.ac.uk](mailto:miltonr1@cardiff.ac.uk) and [carvalhom@cardiff.ac.uk](mailto:carvalhom@cardiff.ac.uk)

### Appendix M2. Laboratory Confirmation of Sepsis

Infants presenting with clinical signs of sepsis from either EOS or LOS group will have blood drawn from them in an aseptic manner and specimens will be treated as described in 2.

## Appendix M2: Microbiology and Processing of Blood and Blood Cultures

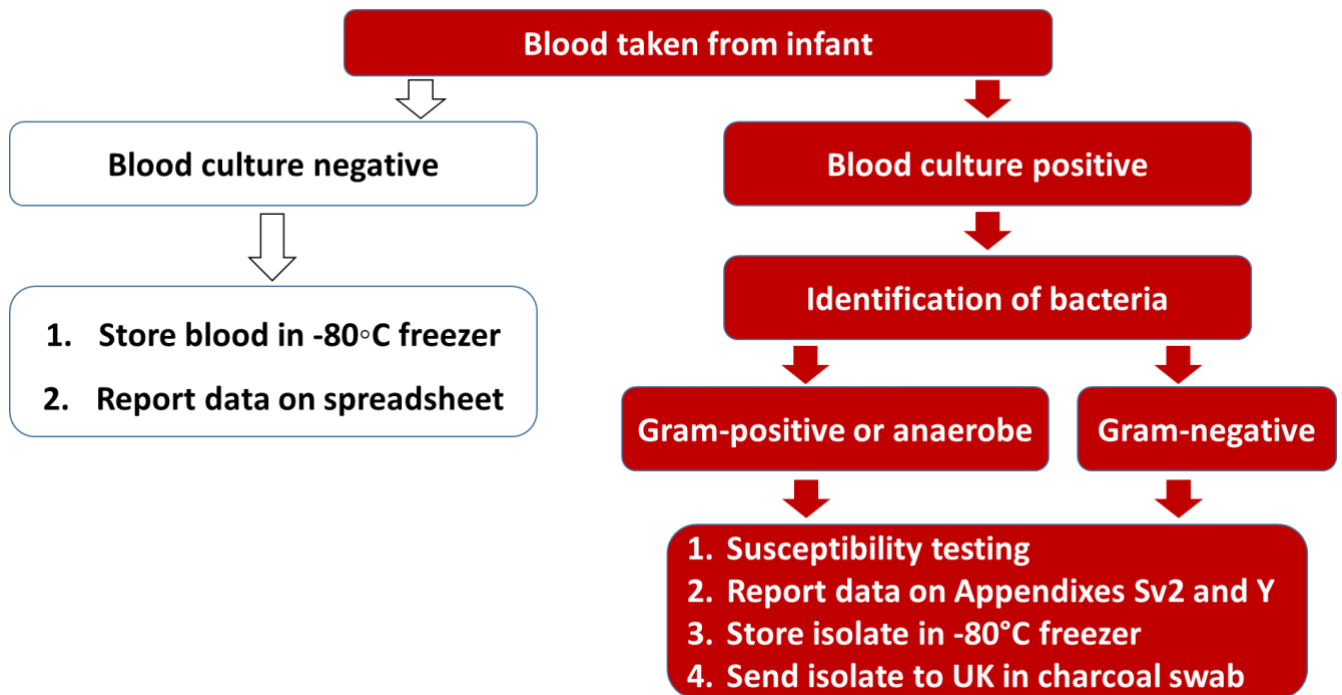

## Appendix M3: Processing Blood Cultures

### 2.0 Procedure for collection of blood samples:

- 2.1 Label each blood culture bottle (BCB) using a waterproof pen or marker.
- 2.2 Disinfect the top of the BCB with 70% ethanol before inoculating.
- 2.3 Follow the in-house current procedures for drawing blood (wash hands, disinfect the skin at the venepuncture site, etc.). Avoid contamination.
- 2.4 Draw between 0.5ml and 2.5ml (maximum) of blood (this is dependent on the size / health of the baby) as much blood as possible should be added to the BCB.
- 2.5 If you can use a receptacle which separates the red blood cells then please do so, we would ideally like a 200-300µl of plasma or serum.
- 2.6 Incubate BCBs at 37°C for five days (minimum of four days if capacity is an issue).

### 3.0 Growth of bacterial cultures and isolates recovering:

- 3.1 Using a needle and syringe, withdraw a low volume of the positive blood culture from the BCB and lay 6 drops onto each of 3 plates of Columbia Blood Agar supplemented with 5% sterile blood (sheep or horse). Incubate plates at aerobic conditions at 35 - 37°C for 18h.
- 3.2 Individual pure colonies should be picked for further tests by subculture in the same media using the same conditions.

### 4.0 Gram-staining:

- Perform Gram staining in each of the distinct isolates collected as follows:
- 4.1 Prepare a smear and heat gently to fix.
  - 4.2 Flood the slide with 0.5% methyl/crystal violet and leave for 30s.
  - 4.3 Tilt the slide, pour on sufficient (1%) Lugol's iodine to wash away the stain, cover with fresh iodine and allow to act for 30s.
  - 4.4 Tilt the slide and wash off the iodine with 95-100% ethanol, or acetone, until colour ceases to run out of the smear.
  - 4.5 Rinse with water.
  - 4.6 Pour on 0.1% counterstain (neutral red, safranin or carbol fuchsin) and leave to act for about 2 minutes.

- 4.7 Wash with water and blot dry.
- 4.8 Interpretation:  
 Positive Result = Gram positive organisms; stain deep blue/purple.  
 Negative Result = Gram negative organisms; stain pink/red.

**5.0 Antimicrobial susceptibility testing and detection of resistance mechanisms:**

- 5.1 Antibiotic susceptibility testing should be performed using the Kirby-Bauer method according to EUCAST V5.0/CLSI M100-S23. Antimicrobial disks should be handled and stored according to the manufacturer's instructions.
- 5.2 *E. coli* ATCC25922 and *Klebsiella pneumoniae* ATCC700603 strains will be used as quality controls to monitor tests performance and should be tested alongside the isolates in study. *S. aureus* ATCC29213 will be used as an additional quality control strain to monitor vancomycin test performance for Gram-positive isolates in study.
- 5.3 Mueller-Hinton agar should be prepared according to the manufacturer's instructions.
- 5.4 Dispense the agar in Petri dishes to achieve an even depth of 4.0 mm with a maximum variation of  $\pm 0.5$  mm (~25ml per plate). Store plates in sealed plastic bags at 4-8°C.
- 5.5 With a sterile cotton swab, suspend several colonies from fresh overnight growth in sterile saline (0.85% NaCl w/v in water) to the density of a McFarland 0.5 turbidity standard (approximately corresponding to  $1-2 \times 10^8$  CFU/mL for *Escherichia coli*). All inoculum suspensions should optimally be used within 15 min and always within 60 min of preparation.
- 5.6 Dip the cotton swab into the inoculum suspension and remove the excess fluid by turning the swab against the inside of the tube.
- 5.7 Spread the inoculum evenly over the entire surface of the plate by swabbing in three directions or by using an automatic plate rotator.
- 5.8 Apply the antimicrobial disks firmly on the agar surface within 15 min of inoculation of the plates. Find the list of antibiotics to be used in List A for Gram-negative isolates. For Gram-positive isolates, additionally test ceftioxin (30 $\mu$ g) by disk diffusion and vancomycin by MIC strip test as described in 6.0. (NOTE: It is important that zone diameters can be reliably measured and the maximum number of disks on a plate depends on the size of the plate, the organism and the antimicrobial agents tested. The number of disks on a plate should be limited so that unacceptable overlapping of zones is avoided. Display disks as seen in Fig.4.)
- 5.9 Within 15 min of application of antimicrobial disks, invert the plates and incubate at  $35 \pm 1^\circ\text{C}$  for 16–20 h.
- 5.10 After incubation, a correct inoculum and satisfactorily streaked plates should result in an even confluent lawn of growth. If individual colonies can be seen, the inoculum is too light and the test should be repeated with fresh cultures.
- 5.11 Read plates from the back with reflected light and held above a dark background.
- 5.12 Measure inhibition zone diameters at the point where no obvious growth is detected by the unaided eye with a ruler, calliper or an automated zone reader.
- 5.13 Record the results electronically using 'Appendix S v2'.

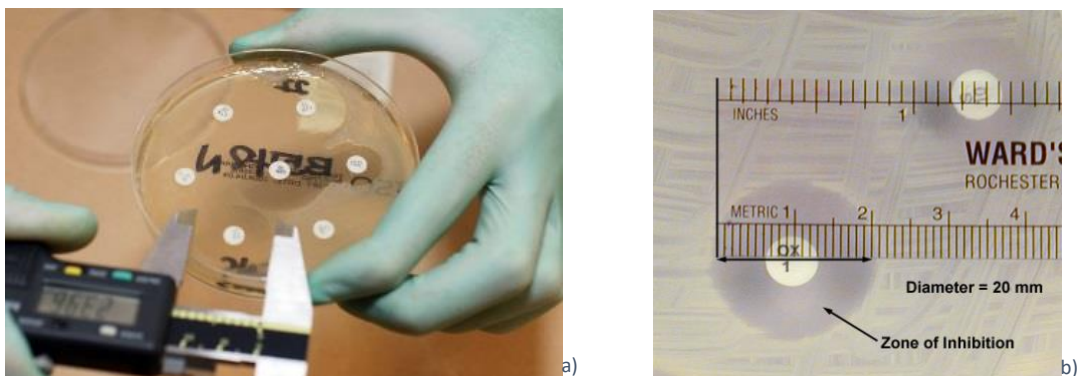

Figure 1 – Measuring inhibition zone diameters using a) a calliper and b) a ruler.

## 6.0 Detection of mechanisms of resistance:

- 6.1 For the detection of extended spectrum beta-lactamases (ESBLs) and metallo-beta-lactamases (MBLs) production, and testing for colistin and vancomycin susceptibility, strips will be used as per manufacturer's instructions. Strips should be stored accordingly.
- 6.2 Quality control strains should be used as described in 3.2.
- 6.3 For preparation of media, bacterial cultures, bacterial suspensions and inoculation, follow steps 3.3 to 3.7.
- 6.4 With sterile tweezers, apply the strips as seen in Fig. 2 to the agar surface with the M.I.C. scale facing upwards and code of the strip to the outside of the plate, pressing it with the tweezers on the surface of the agar and ensure that whole length of the antibiotic gradient is in complete contact with the agar surface. Once applied, do not move the strip.
- 6.5 Incubate the agar plates in an inverted position at  $35 \pm 2^\circ\text{C}$  for 16-20 hours.

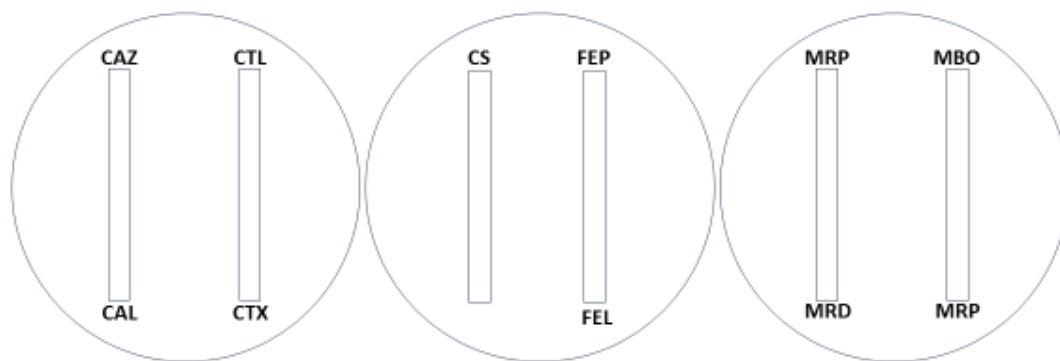

Figure 2 - Placing strips in the plate. CAZ: Ceftazidime; CAL: Ceftazidime+Clavulanic Acid; CTL: Cefotaxime+Clavulanic Acid; CTX: Cefotaxime; CS: Colistin; FEP: Cefepime; FEL: Cefepime+Clavulanic Acid; MRP: Meropenem; MRD: Meropenem+EDTA; MBO: Meropenem+Boronic Acid.

## 7.0 Preliminary species identification of the Gram-negative isolates:

- 7.1 Enterosystem 18R will be used for biochemical/phenotypical identification of *Enterobacteriaceae* ONLY, as per manufacturer's instructions and exposed below.
- 7.2 *E. coli* ATCC25922 will be used as quality control to monitor tests performance and should be tested alongside the isolates in study.
- 7.3 Store the product at  $2 - 8^\circ\text{C}$  according to the manufacturer's instructions.
- 7.4 Suspend several colonies from fresh overnight growth in sterile saline (0.85% NaCl w/v in water) to the density of a McFarland 0.5<sup>1</sup> turbidity standard (approximately corresponding to  $1-2 \times 10^8$  CFU/mL for *Escherichia coli*).
- 7.5 Take a system from its wrapper and bring it to room temperature.
- 7.6 Write down date and code of the microorganism.
- 7.7 Transfer 0.2 mL of bacterial suspension into each well of the system and overlay with 1 drop of Vaseline oil the wells 2-LDC, 3-ODC, 4-ADC, 7-UR and 8-H<sub>2</sub>S.
- 7.8 Cover the system with the lid provided and incubate at  $36 \pm 1^\circ\text{C}$  for 12-18-24 hours.
- 7.9 Add 2 drops of alpha-naphthol and 1 drop of NaOH 40% (ref. 80252) into the well 10-VP (VP test reagents – with the additional biochemical reagents for Enterosystem 18R). Wait for the development of a pink-red colour in about 15-20 minutes.
- 7.10 Add 2 or 3 drops of KOVAC'S Reagent (ref. 80252 – with the additional biochemical reagents for Enterosystem 18R) into the well 11-IND. Wait for the development of a red colour in about 1-2 minutes.
- 7.11 Watch for the colour change in the wells and interpret the results using table 1.

Table 1 - Results and interpretation.

| Well               | REACTIONS FOR THE BIOCHEMICAL IDENTIFICATION | Well color        |                   |
|--------------------|----------------------------------------------|-------------------|-------------------|
|                    |                                              | Positive reaction | Negative reaction |
| 1-ONPG             | ONPG hydrolysis                              | yellow            | colorless         |
| 2-LDC              | Lysine decarboxylation                       | red               | yellow-orange     |
| 3-ODC              | Ornithine decarboxylation                    | red               | yellow-orange     |
| 4-ADC              | Arginine decarboxylation                     | red               | yellow-orange     |
| 5-PD               | Phenylalanine deamination                    | black-brown       | yellow            |
| 6-CIT              | Citrate utilization                          | blue-dark green   | light green       |
| 7-UR               | Urea hydrolysis                              | red-fuchsia       | yellow-orange     |
| 8-H <sub>2</sub> S | Hydrogen sulphide production                 | black             | yellow            |
| 9-MLN              | Malonate utilization                         | blue-green        | yellow            |
| 10-VP              | VP test                                      | pink-red          | yellow            |
| 11-IND             | Indole test                                  | red               | yellow            |
| 12-GLU             | Glucose fermentation                         | yellow            | blu-verde         |
| 13-MAN             | Mannitol fermentation                        | yellow            | blu-verde         |
| 14-INO             | Inositol fermentation                        | yellow            | blu-verde         |
| 15-SOR             | Sorbitol fermentation                        | yellow            | blu-verde         |
| 16-SAC             | Saccharose fermentation                      | yellow            | blu-verde         |
| 17-ARA             | Arabinose fermentation                       | yellow            | blu-verde         |
| 18-RAF             | Raffinose fermentation                       | yellow            | blu-verde         |

7.12 Note the results on the test results form and determine the 6-digit code following instructions provided in 7.13 (NUMERICAL CODE FORMATION).

7.13 Identify the organism by using the ENTEROSYSTEM 18R Code Book (ref. 71710) or the Identification Code Disk (ref. 71711).

7.14 Numerical code formation – the biochemical tests are separated into 6 groups of 3 and a value of 1, 2 or 4 is indicated for each:

- Value 1: first test positive in each group (ONPG, ADC, UR, VP, MAN, SAC);
- Value 2: second test positive in each group (LDC, PD, H<sub>2</sub>S, IND, INO, ARA);
- Value 4: third test positive in each group (ODC, CIT, MLN, GLU, SOR, RAF);
- Value 0: every negative test.

A 6-digit code is obtained by adding together the values corresponding to positive reactions within each group. The code allows the identification of the organism under examination by using the ENTEROSYSTEM 18R Code Book (ref. 71710) or the Identification Code Disk software (ref. 71711). The example below shows how a numerical code can be formed.

7.15 Record the results electronically.

### 8.0 Preliminary species identification of the Gram-positive isolates:

| Test                                                 | Group 1 |     |     | Group 2 |    |     | Group 3 |                  |     | Group 4 |     |     | Group 5 |     |     | Group 6 |     |     |
|------------------------------------------------------|---------|-----|-----|---------|----|-----|---------|------------------|-----|---------|-----|-----|---------|-----|-----|---------|-----|-----|
|                                                      | ONPG    | LDC | ODC | ADC     | PD | CIT | UR      | H <sub>2</sub> S | MLN | VP      | IND | GLU | MAN     | INO | SOR | SAC     | ARA | RAF |
| Values                                               | 1       | 2   | 4   | 1       | 2  | 4   | 1       | 2                | 4   | 1       | 2   | 4   | 1       | 2   | 4   | 1       | 2   | 4   |
| Results                                              | +       | +   | +   | -       | -  | -   | -       | -                | -   | -       | +   | +   | +       | -   | +   | -       | +   | -   |
| Sum of values                                        | 7       |     |     | 0       |    |     | 0       |                  |     | 6       |     |     | 5       |     |     | 2       |     |     |
| CODE: 700652 IDENTIFICATION: <i>Escherichia coli</i> |         |     |     |         |    |     |         |                  |     |         |     |     |         |     |     |         |     |     |

Figure 3 - Example of numerical code formation.

8.1 Use in-house methods already established in your institution.

Or, if none used,

8.2 Use Staf System 18R (Liofilchem®, ref. 71630) for *Staphylococcus* sp. or Streptosystem 12R (Liofilchem®, ref. 72560) for *Streptococcus* sp. isolates according to the manufacturer's instructions.

### 9.0 Isolates storage:

- 9.1 Using a swab in charcoal transport media, take a sweep of each isolate in pure culture.
- 9.2 Place the swab into the same tube deep enough that medium covers the cotton tips.
- 9.3 Seal tubes with Sellotape and place the samples in sealed, waterproof containers (i.e., plastic bags). Refrigerate at 4°C.
- 9.4 Shipment will be via containers UN3373 and sent via a reliable international courier which will be organised locally.
- 9.5 A pure culture of each isolate should also be kept in beads for freezing at -80°C. For this a take a 10 µl loop full of the pure culture, add to the tube and mix by vortexing. Beads should be labelled with the appropriate code and in accordance with the instructions which will be supplied by Cardiff University. Each laboratory should have an appropriate database with records of all samples and isolates recovered from them.

#### List A – Antimicrobial disks to be used and respective concentrations

- Amoxicillin – 10µg
- Amoxicillin/Clavulanic acid – 20/10µg
- Piperacillin/Tazobactam – 30/6µg
- Ceftazidime – 10µg
- Cefotaxime – 5µg
- Cefepime – 30µg
- Aztreonam – 30µg
- Ertapenem – 10µg
- Imipenem – 10µg
- Meropenem – 10µg
- Trimethoprim/sulphamethoxazole – 1.25/23.75µg
- Gentamicin – 10µg
- Amikacin – 30µg
- Tigecycline – 15µg
- Fosfomycin – 200µg (CLSI\_M100-S23)
- Levofloxacin – 5µg
- Ciprofloxacin – 5µg
- Nitrofurantoin – 100µg

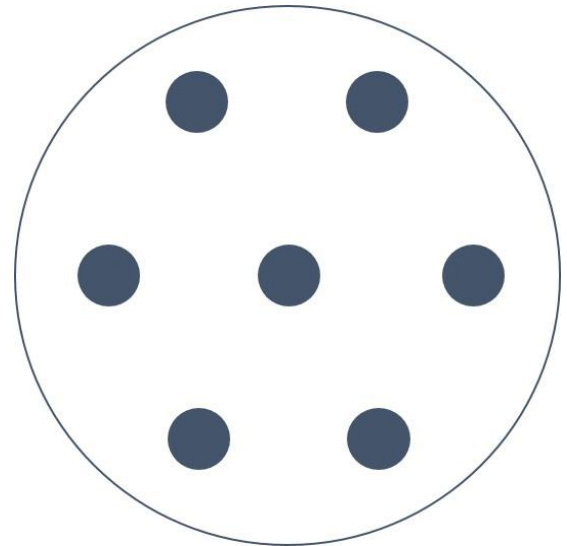

#### List A.1 – Additional antibiotics to be tested against Gram-positive isolates only

- Vancomycin (MIC test strip)
- Cefoxitin – 30µg

Figure 4 - Antimicrobial disks disposal. The external circle represents the Petri dish and dots represent antimicrobial disks.

Supplementary Figure S2 – Microbiology protocol used at the clinical sites during the BARNARDS study



## **Appendix: Enrolment consent Form**

### **Purpose of the study**

You are being invited to participate in our study focussed on the burden of antibiotic resistance in neonates from developing societies. The level of antibiotic resistance in neonatal infections and its impact on mortality in low-middle income countries is unacceptably high. This study will provide the means, support, network and tools to understand the impact of antibiotic resistance on neonatal morbidity and mortality (*in country*) as well as to identify possible solutions to minimise its impact.

### **Procedure**

Once we have obtained informed consent from you, a rectal swab will be collected from you and this swab will be sent to the UK for screening. Your swab will be assessed for multi-drug resistance (MDR) (specifically ESBL and carbapenemase positive) Gram-negative bacteria. A rectal swab will be also taken from your baby if he / she develops early ( $\leq 72$  hours) or late onset bacterial sepsis ( $>72$  hours) and the results from your baby's swab will be compared to your results.

We will also require some basic demographic information and record antimicrobial therapy you were subjected to in the hospital. Our trained nurses will carry out the above mentioned procedure.

### **Possible risks or discomforts**

There are no side effects of the study and the procedure will be discrete, quick and painless.

### **Possible benefits**

No personal benefit, however it will improve the care and assessment of your child and provide long term strategies to improve health in (*name country*)

### **Financial considerations**

There is no financial compensation for your participation in this research but we'll do all laboratory tests of your sample free-of-charge.

### **Confidentiality**

Your identity in this study will be treated as confidential. The results of the study may be published for scientific purposes but we will not give your name or include any identifiable references of you. Only the investigators of the study, data collectors will have access to your data. Your anonymity will be safeguarded under the rules we will adhere to in the Helsinki Declaration.

### **Termination of research study**

It is important for you to understand that participation in this research is your own decision. You will decide whether you will take part in this study or not, and that you can withdraw from this study at any time during the research. This will not affect your present and future medical care in this hospital.

### **Available source of information**

For any other problem or query please consult the local principal investigator of this study:

Name:

Email:

Telephone:

Address:

### **Authorisation**

I have understood this consent form, and I volunteer to participate in this research study. I understand that I will receive a copy of this form. I voluntarily choose to participate, but I understand that my consent does not take away any legal rights in the case of negligence or other legal fault of anyone who is involved in this study. I further understand that nothing in this consent form is intended to replace any applicable Federal, state, or local laws.

Name of the patient: .....

Signature: \_\_\_\_\_ Date: \_\_\_\_\_

Supplementary Figure S3 – Enrolment and consent form for the BARNARDS study

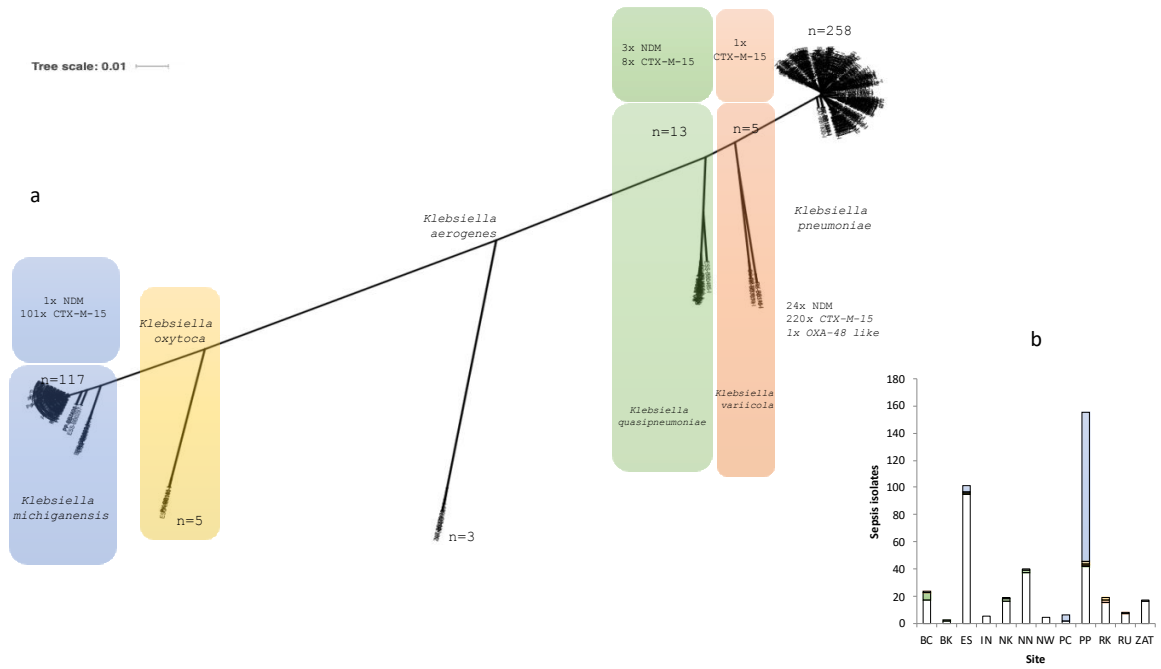

Supplementary Figure S4 – (a) Core genome phylogenetic analysis of *Klebsiella* spp. characterised during BARNARDS, using Roary (v3.12.0) and Fasttree (v2.1.11). The prevalence of *bla*<sub>NDM</sub>, *bla*<sub>OXA-48</sub> group, and *bla*<sub>CTX-M-15</sub> per species is also shown. (b) The proportion of *Klebsiella* spp. found per site.

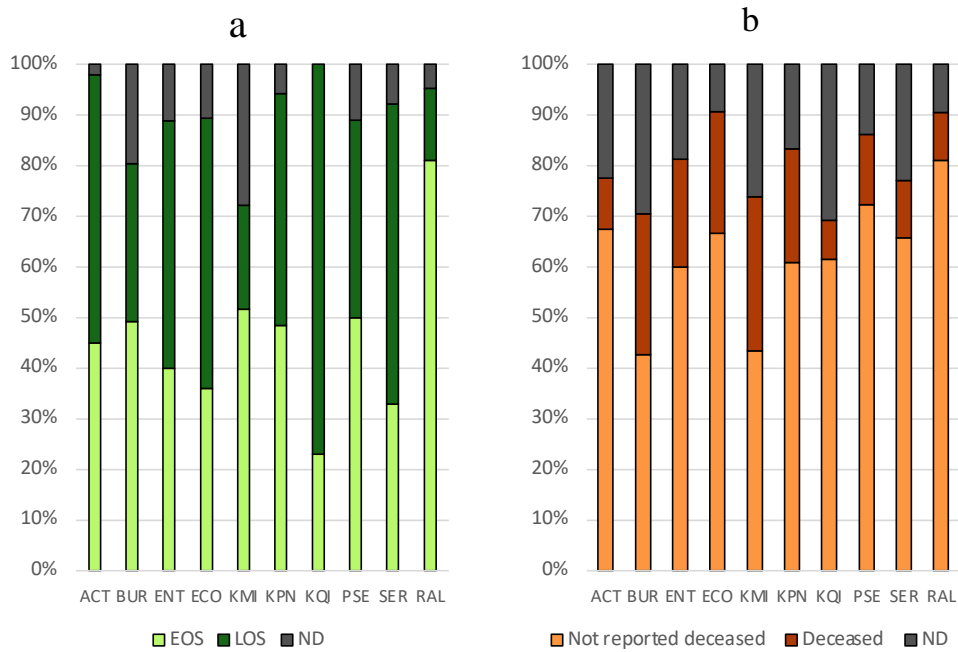

Supplementary Figure S5 - a) Onset of neonatal sepsis for the 10 most frequently identified Gram-negative (GNB) bacteria. b) Outcome of neonatal sepsis for the 10 most frequently identified GNB.

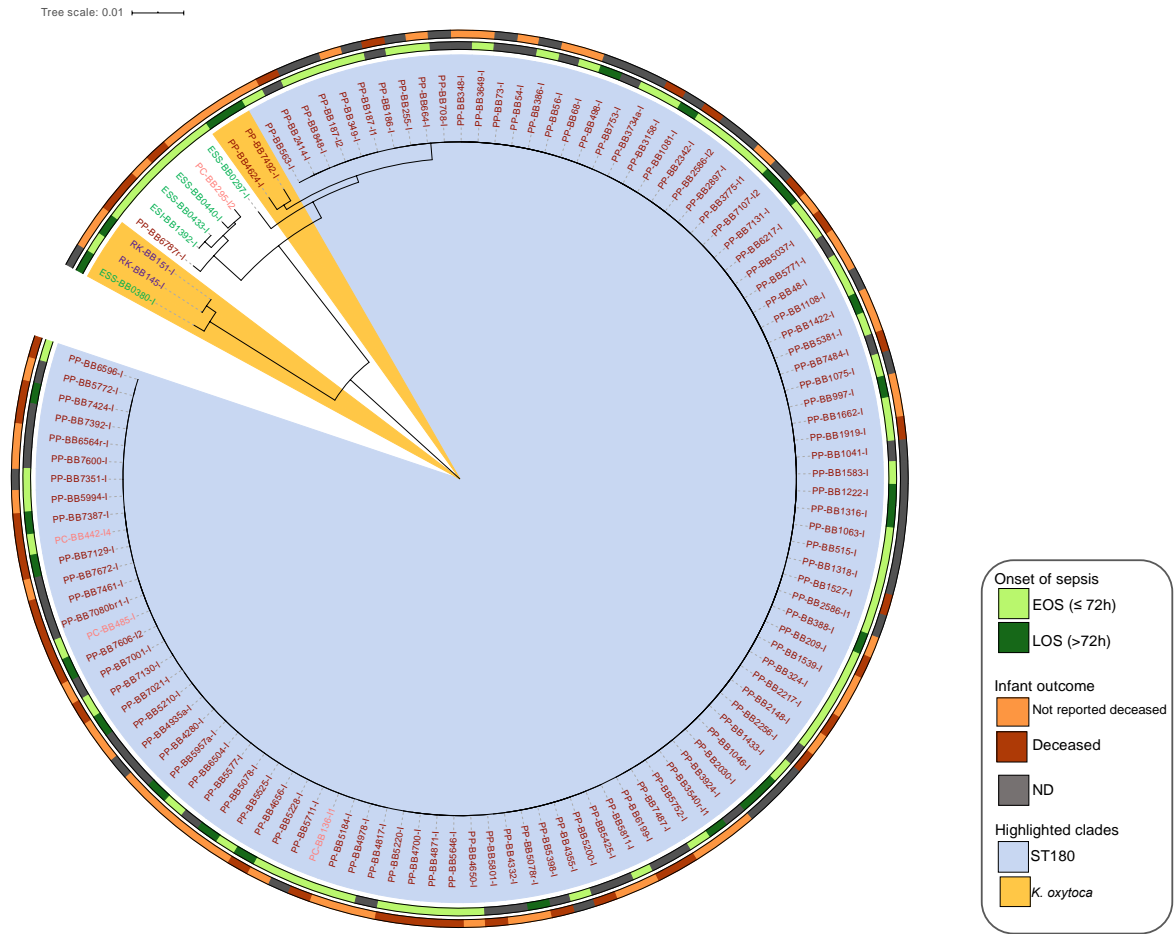

Supplementary Figure S6 - Core genome phylogenetic analysis of *Klebsiella michiganensis* species using Roary (v3.12.0) and Fasttree (v2.1.11). Leaves are colour coded per site. Closely related isolates (deciphered from identical branch lengths) are highlighted in blue and are all *K. michiganensis* from Pakistan. The orange highlighted clades denote *K. oxytoca* isolates, as per WGS identification. Onset of sepsis (green) and outcome of neonate (orange) are wrapped outside of the phylogeny.



Tree scale: 0.001

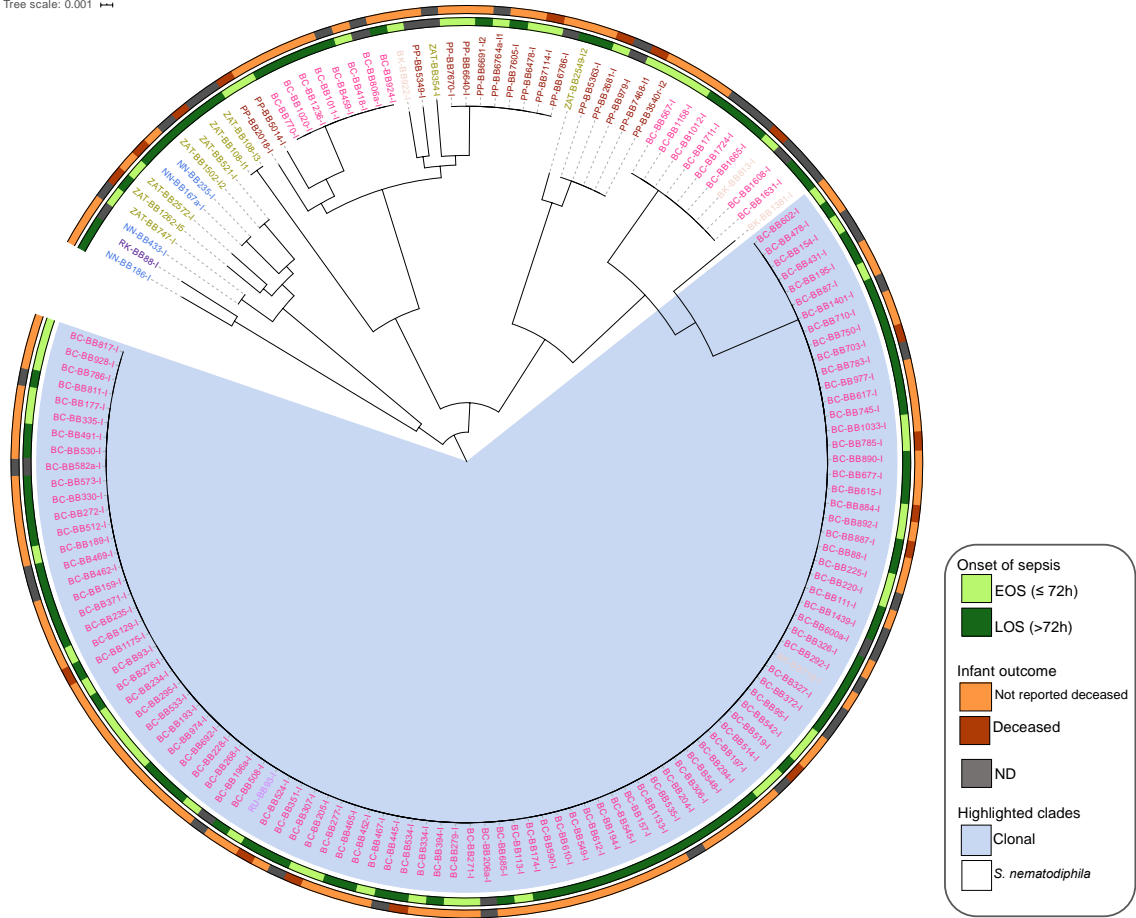

Supplementary Figure S8 - Core genome phylogenetic analysis of *Serratia* species using Roary (v3.12.0) and Fasttree (v2.1.11). Leaves are colour coded per site. Closely related isolates (deciphered from identical branch lengths) are highlighted in blue and are all *S. marcescens* from Bangladesh. The single highlighted clade (dark green) denotes a *Serratia nematophililia*. Onset of sepsis (green) and outcome of neonate (orange) are wrapped outside of the phylogeny.

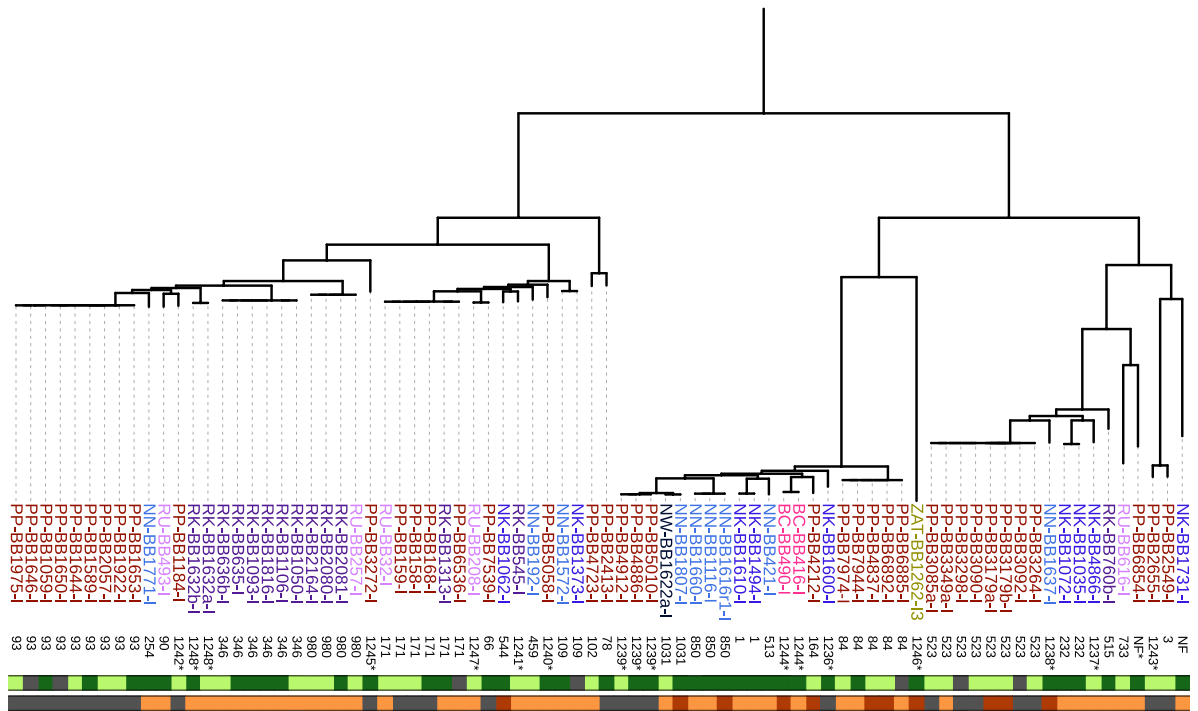

Supplementary Figure S9 - Core genome phylogenetic analysis of *Enterobacter* species using Roary (v3.12.0) and Fasttree (v2.1.11). Leaves are colour coded per site. ST is added as a text value underneath the leaf code. Onset of sepsis (green) and outcome of neonate (orange) are wrapped outside of the phylogeny.

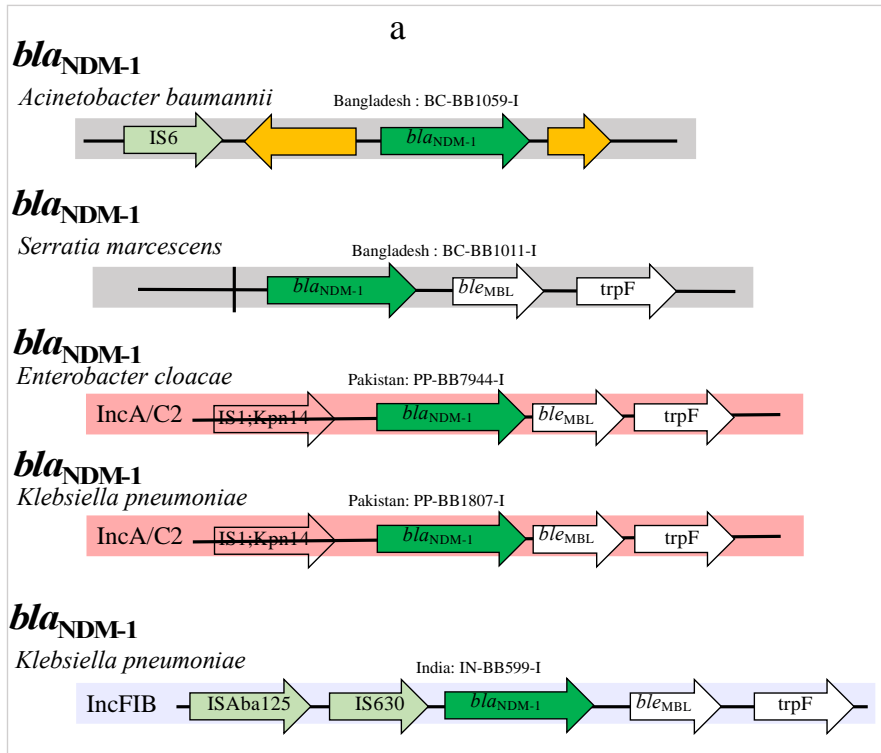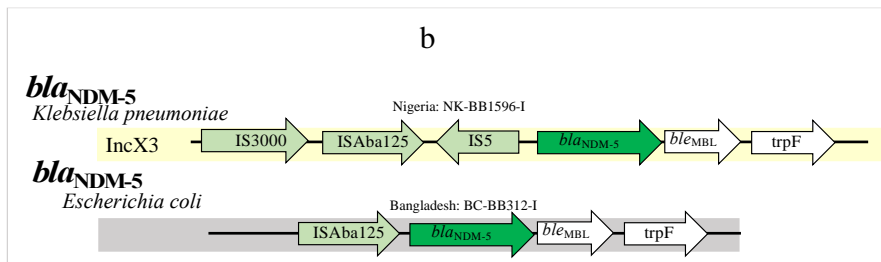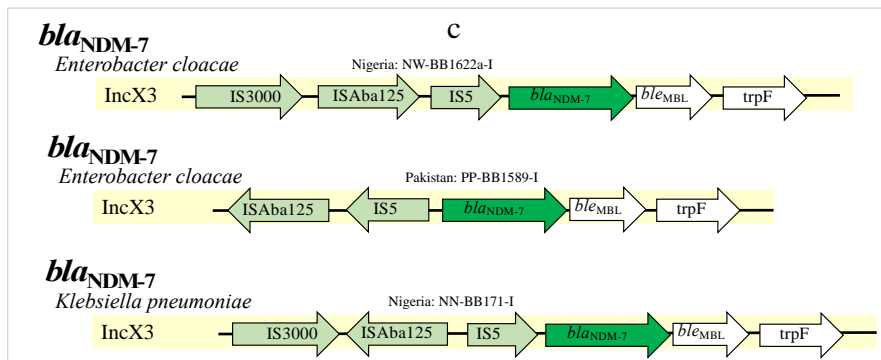

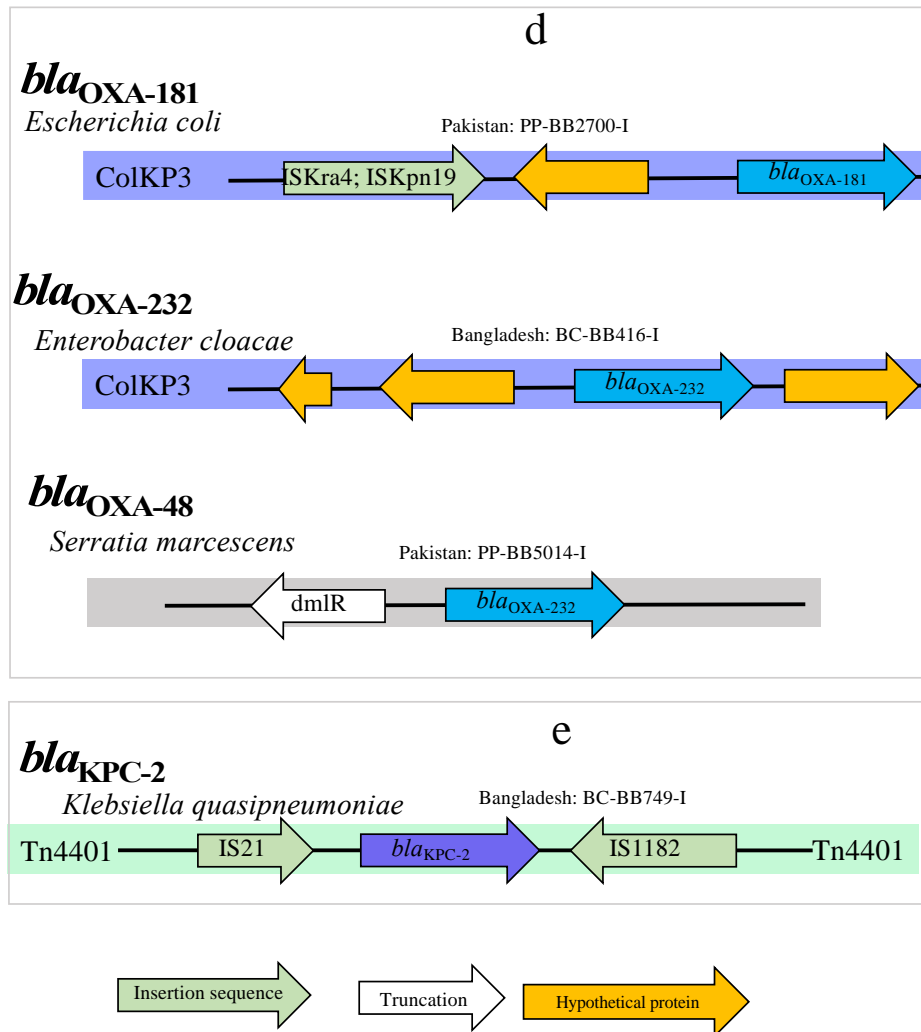

Supplementary Figure S10 – Genetic context maps of contigs containing carbapenemase genes. a) plasmid types, and insertion sequences around Gram-negative species carrying *bla*<sub>NDM-1</sub>. b and c) plasmid types, and insertion sequences around Gram-negative species carrying *bla*<sub>NDM-5</sub> and *bla*<sub>NDM-7</sub>. d) plasmid types, and insertion sequences around Gram-negative species carrying *bla*<sub>OXA-48</sub> like variants. e) The genetic environment around the single *bla*<sub>KPC-2</sub> carbapenemase gene found within this study showing insertion sequences and the transposon.



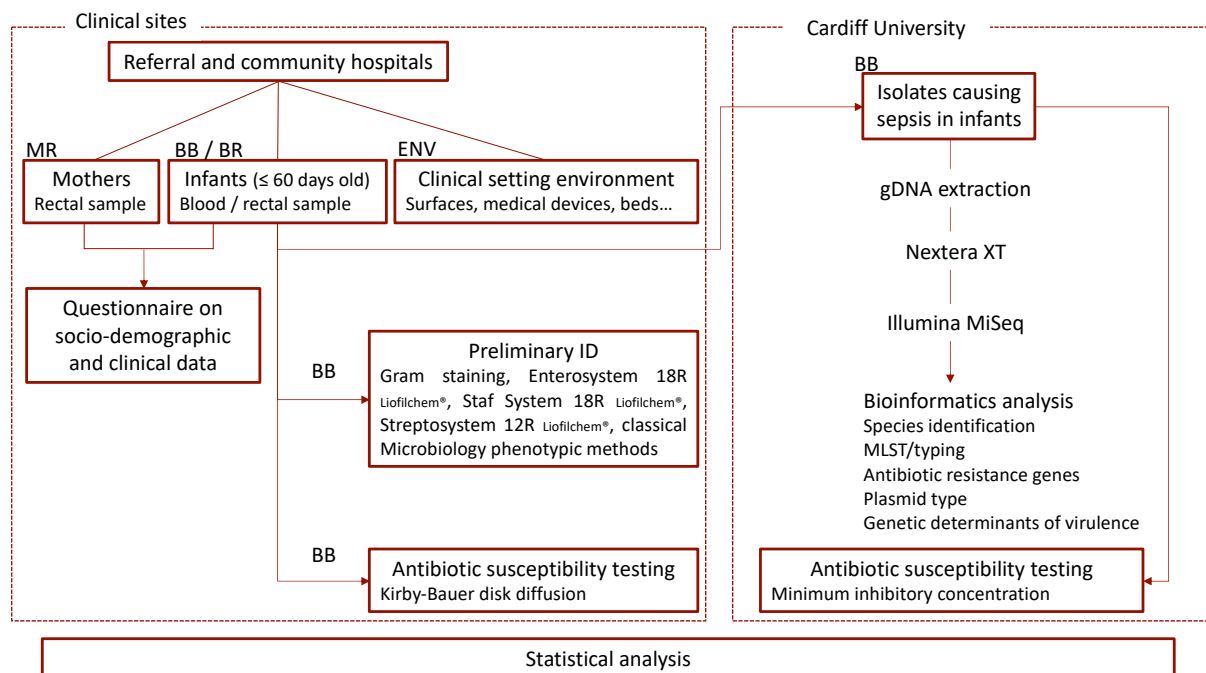

Supplementary Figure S11 - Flow diagram showing the standardised laboratory procedures and the workflow for the characterisation of BB isolates outlining the procedures at all clinical sites and at Cardiff University.

Supplementary Table 1 - Incidence of different Gram-negative bacterial species causing sepsis during BARNARDS.

|                                     | Site |    |     |    |    |    |    |    |     |    |    |     | Total |
|-------------------------------------|------|----|-----|----|----|----|----|----|-----|----|----|-----|-------|
|                                     | BC   | BK | ES  | IN | NK | NN | NW | PC | PP  | RK | RU | ZAT |       |
| <i>Achromobacter insolitus</i>      | 0    | 0  | 0   | 0  | 0  | 2  | 0  | 0  | 0   | 0  | 0  | 0   | 2     |
| <i>Achromobacter</i> sp.            | 0    | 0  | 0   | 0  | 0  | 0  | 0  | 0  | 0   | 1  | 0  | 0   | 1     |
| <i>Achromobacter xylosoxidans</i>   | 0    | 0  | 0   | 1  | 0  | 1  | 0  | 0  | 2   | 0  | 0  | 0   | 4     |
| <i>Acinetobacter baumannii</i>      | 7    | 2  | 7   | 3  | 3  | 0  | 0  | 1  | 8   | 2  | 2  | 3   | 38    |
| <i>Acinetobacter bereziniae</i>     | 2    | 0  | 0   | 0  | 0  | 0  | 0  | 0  | 0   | 0  | 0  | 0   | 2     |
| <i>Acinetobacter junii</i>          | 1    | 0  | 0   | 0  | 0  | 0  | 0  | 0  | 0   | 0  | 0  | 0   | 1     |
| <i>Acinetobacter nosocomialis</i>   | 1    | 0  | 0   | 0  | 0  | 1  | 0  | 0  | 0   | 0  | 1  | 0   | 3     |
| <i>Acinetobacter radioresistens</i> | 0    | 0  | 0   | 0  | 0  | 0  | 0  | 0  | 1   | 0  | 0  | 0   | 1     |
| <i>Acinetobacter schindleri</i>     | 0    | 0  | 0   | 0  | 2  | 0  | 0  | 0  | 0   | 0  | 0  | 0   | 2     |
| <i>Acinetobacter</i> sp.            | 1    | 0  | 0   | 0  | 0  | 0  | 0  | 0  | 1   | 0  | 0  | 0   | 2     |
| <i>Aeromonas hydrophila</i>         | 0    | 0  | 0   | 0  | 1  | 0  | 0  | 0  | 0   | 0  | 0  | 0   | 1     |
| <i>Aeromonas</i> sp.                | 0    | 0  | 1   | 0  | 1  | 0  | 0  | 0  | 0   | 0  | 0  | 0   | 2     |
| <i>Burkholderia cenocepacia</i>     | 1    | 0  | 0   | 0  | 0  | 0  | 0  | 1  | 54  | 0  | 0  | 0   | 56    |
| <i>Burkholderia cepacia</i>         | 1    | 0  | 0   | 0  | 0  | 0  | 0  | 0  | 0   | 0  | 0  | 0   | 1     |
| <i>Burkholderia gladioli</i>        | 0    | 0  | 0   | 0  | 0  | 0  | 0  | 0  | 1   | 0  | 0  | 0   | 1     |
| <i>Burkholderia</i> sp.             | 3    | 0  | 0   | 0  | 0  | 0  | 0  | 0  | 0   | 0  | 0  | 0   | 3     |
| <i>Chryseobacterium</i> sp.         | 0    | 0  | 0   | 0  | 1  | 0  | 0  | 0  | 0   | 0  | 0  | 0   | 1     |
| <i>Citrobacter braakii</i>          | 0    | 0  | 1   | 0  | 0  | 0  | 0  | 0  | 0   | 0  | 0  | 0   | 1     |
| <i>Citrobacter freundii</i>         | 1    | 1  | 0   | 0  | 1  | 0  | 0  | 0  | 0   | 0  | 0  | 0   | 3     |
| <i>Citrobacter sedlakii</i>         | 0    | 0  | 0   | 0  | 0  | 0  | 0  | 0  | 0   | 0  | 1  | 0   | 1     |
| <i>Enterobacter asburiae</i>        | 0    | 0  | 0   | 0  | 0  | 0  | 0  | 0  | 1   | 0  | 0  | 0   | 1     |
| <i>Enterobacter cloacae</i>         | 2    | 0  | 0   | 0  | 5  | 9  | 1  | 0  | 16  | 10 | 3  | 0   | 46    |
| <i>Enterobacter cloacae</i> complex | 0    | 0  | 0   | 0  | 2  | 0  | 0  | 0  | 8   | 1  | 0  | 0   | 11    |
| <i>Enterobacter hormaechei</i>      | 0    | 0  | 0   | 0  | 0  | 0  | 0  | 0  | 13  | 3  | 2  | 0   | 18    |
| <i>Enterobacter kobei</i>           | 0    | 0  | 0   | 0  | 0  | 0  | 0  | 0  | 1   | 0  | 0  | 0   | 1     |
| <i>Enterobacter ludwigii</i>        | 0    | 0  | 0   | 0  | 0  | 0  | 0  | 0  | 0   | 0  | 0  | 1   | 1     |
| <i>Enterobacter</i> sp.             | 0    | 0  | 0   | 0  | 1  | 0  | 0  | 0  | 0   | 0  | 0  | 0   | 1     |
| <i>Enterobacter xiangfangensis</i>  | 0    | 0  | 0   | 0  | 1  | 0  | 0  | 0  | 0   | 0  | 0  | 0   | 1     |
| <i>Escherichia coli</i>             | 3    | 0  | 11  | 2  | 15 | 7  | 1  | 3  | 10  | 15 | 2  | 6   | 75    |
| <i>Franconibacter pulveris</i>      | 0    | 0  | 0   | 0  | 1  | 0  | 0  | 0  | 0   | 0  | 0  | 0   | 1     |
| <i>Klebsiella aerogenes</i>         | 0    | 0  | 0   | 0  | 1  | 1  | 0  | 0  | 0   | 0  | 0  | 1   | 3     |
| <i>Klebsiella michiganensis</i>     | 0    | 0  | 4   | 0  | 0  | 0  | 0  | 4  | 109 | 0  | 0  | 0   | 117   |
| <i>Klebsiella oxytoca</i>           | 0    | 0  | 1   | 0  | 0  | 0  | 0  | 0  | 2   | 2  | 0  | 0   | 5     |
| <i>Klebsiella pneumoniae</i>        | 17   | 2  | 95  | 5  | 16 | 37 | 4  | 2  | 42  | 15 | 7  | 16  | 258   |
| <i>Klebsiella quasipneumon</i>      | 6    | 1  | 1   | 0  | 2  | 2  | 0  | 0  | 1   | 0  | 0  | 0   | 13    |
| <i>Klebsiella variicola</i>         | 1    | 0  | 0   | 0  | 0  | 0  | 0  | 0  | 1   | 2  | 1  | 0   | 5     |
| <i>Leclercia adecarboxylata</i>     | 0    | 0  | 0   | 0  | 1  | 1  | 0  | 0  | 0   | 0  | 0  | 0   | 2     |
| <i>Morganella morganii</i>          | 0    | 0  | 0   | 0  | 0  | 0  | 0  | 0  | 0   | 1  | 0  | 0   | 1     |
| NA                                  | 2    | 0  | 28  | 1  | 6  | 2  | 0  | 7  | 67  | 3  | 2  | 1   | 119   |
| <i>Pantoea calida</i>               | 0    | 0  | 0   | 1  | 0  | 0  | 0  | 0  | 0   | 0  | 0  | 0   | 1     |
| <i>Pantoea dispersa</i>             | 1    | 0  | 0   | 0  | 0  | 0  | 0  | 0  | 0   | 0  | 0  | 0   | 1     |
| <i>Pantoea eucrina</i>              | 0    | 0  | 0   | 0  | 0  | 1  | 0  | 0  | 0   | 0  | 0  | 0   | 1     |
| <i>Pantoea</i> sp.                  | 1    | 0  | 0   | 0  | 0  | 0  | 0  | 0  | 0   | 0  | 0  | 0   | 1     |
| <i>Phytobacter</i> sp.              | 0    | 0  | 0   | 0  | 0  | 1  | 0  | 0  | 0   | 0  | 0  | 0   | 1     |
| <i>Proteus mirabilis</i>            | 0    | 0  | 0   | 0  | 1  | 0  | 0  | 0  | 1   | 0  | 0  | 1   | 3     |
| <i>Providencia rettgeri</i>         | 0    | 0  | 0   | 0  | 0  | 0  | 0  | 0  | 1   | 0  | 0  | 0   | 1     |
| <i>Pseudesccherichia vulner</i>     | 0    | 0  | 0   | 0  | 0  | 0  | 0  | 0  | 2   | 0  | 0  | 0   | 2     |
| <i>Pseudomonas aeruginosa</i>       | 1    | 4  | 0   | 1  | 2  | 3  | 0  | 1  | 9   | 2  | 0  | 0   | 23    |
| <i>Pseudomonas alcaligenes</i>      | 0    | 0  | 0   | 0  | 0  | 4  | 0  | 0  | 0   | 0  | 0  | 0   | 4     |
| <i>Pseudomonas fluorescens</i>      | 1    | 0  | 0   | 0  | 0  | 0  | 0  | 0  | 0   | 0  | 0  | 0   | 1     |
| <i>Pseudomonas fragi</i>            | 0    | 0  | 0   | 0  | 1  | 0  | 0  | 0  | 0   | 0  | 0  | 0   | 1     |
| <i>Pseudomonas</i> sp.              | 0    | 0  | 0   | 0  | 0  | 0  | 0  | 0  | 1   | 0  | 0  | 0   | 1     |
| <i>Pseudomonas stutzeri</i>         | 0    | 0  | 1   | 0  | 2  | 0  | 0  | 0  | 3   | 0  | 0  | 0   | 6     |
| <i>Ralstonia mannitolilytica</i>    | 0    | 0  | 0   | 0  | 5  | 15 | 1  | 0  | 0   | 0  | 0  | 0   | 21    |
| <i>Raoultella ornithinolytica</i>   | 0    | 0  | 0   | 0  | 0  | 0  | 0  | 0  | 2   | 0  | 0  | 0   | 2     |
| <i>Salmonella enterica</i>          | 0    | 0  | 0   | 0  | 6  | 1  | 0  | 0  | 0   | 0  | 0  | 0   | 7     |
| <i>Serratia marcescens</i>          | 117  | 3  | 0   | 0  | 0  | 4  | 0  | 0  | 16  | 1  | 1  | 9   | 151   |
| <i>Serratia nematodiphila</i>       | 0    | 1  | 0   | 0  | 0  | 0  | 0  | 0  | 0   | 0  | 0  | 0   | 1     |
| <i>Stenotrophomonas maltophilia</i> | 0    | 0  | 0   | 0  | 0  | 0  | 0  | 1  | 2   | 0  | 0  | 1   | 4     |
|                                     | 170  | 14 | 150 | 14 | 77 | 92 | 7  | 20 | 375 | 58 | 22 | 39  | 1038  |

Supplementary Table 2 - Summary of clinical, phenotypic, and genomic characterisation delineated by species/genera. n= represents the number of isolates per species with antimicrobial susceptibility profiles and whole genome sequencing data available respectively. If one n= is displayed per species, this represents both datasets for antimicrobial susceptibility profiling and WGS. The clinical metadata includes the onset of sepsis; early onset (EOS) and late onset (LOS) and the number of MfBS. ND – not determined. Both prominent and novel STs are summarised per species. When applicable, additional in silico typing methods were performed. ARGs encoding for  $\beta$ -lactamases and carbapenemases are compared. The number of resistant isolates for most appropriate antibiotics (according to the species) is shown. Additionally, the most frequent plasmid incompatibility types and virulence associated genes are shown, where applicable. NA – not applicable.

| Species/Genera                    | n=WGS/MIC    | Clinical site                                                                                                            | Onset                   | Outcome                     | Prominent STs                                                            | Novel STs                                                      | Other in silico typing                                                             | ARGs encoding $\beta$ -lactamases                                                                                        | ARGs encoding carbapenemases                                                                                                                                                                                             | AMR phenotype (R)                                         | Prominent inc plasmids                               | Prominent virulence determinants                                                               |
|-----------------------------------|--------------|--------------------------------------------------------------------------------------------------------------------------|-------------------------|-----------------------------|--------------------------------------------------------------------------|----------------------------------------------------------------|------------------------------------------------------------------------------------|--------------------------------------------------------------------------------------------------------------------------|--------------------------------------------------------------------------------------------------------------------------------------------------------------------------------------------------------------------------|-----------------------------------------------------------|------------------------------------------------------|------------------------------------------------------------------------------------------------|
| <i>Acinetobacter baumannii</i>    | n=38, n=36   | Bangladesh (BC, BK), Ethiopia (ES), India (IN), Nigeria (NK), Pakistan (PC, PP), Rwanda (RK, RU), South Africa (ZAT)     | 16 EOS, 21 LOS, 1 ND    | 24 nrd, 5 deceased, 9 ND    | ST1, ST2, ST575, ST1106                                                  | ST1237                                                         | N/A                                                                                | <i>bla</i> <sub>PER-1</sub> , <i>bla</i> <sub>TEM</sub>                                                                  | <i>bla</i> <sub>OXA-23</sub> , <i>bla</i> <sub>OXA-51</sub> , <i>bla</i> <sub>OXA-58</sub> , <i>bla</i> <sub>OXA-214</sub> , <i>bla</i> <sub>OXA-229</sub> , <i>bla</i> <sub>OXA-235</sub> , <i>bla</i> <sub>NDM-1</sub> | IPM=20, MEM=20, AMK=20, CST=3, TGC=1                      | N/A                                                  | Biofilm formation, iron uptake, immune evasion                                                 |
| <i>Acinetobacter</i> spp.         | n=11         | Bangladesh (BC), Nigeria (NK, NN), Pakistan (PP), Rwanda (RU)                                                            | 6 EOS, 7 LOS            | 9 nrd, 2 ND                 | N/A                                                                      | N/A                                                            | N/A                                                                                | N/A                                                                                                                      | <i>bla</i> <sub>OXA-23</sub> , <i>bla</i> <sub>OXA-58</sub> , <i>bla</i> <sub>OXA-214</sub> , <i>bla</i> <sub>NDM-1</sub>                                                                                                | IPM=3, MEM=3, AMK=4, CST=2, TGC=0                         | N/A                                                  | Biofilm formation                                                                              |
| <i>Burkholderia cenocepacia</i>   | n=56, n=57   | Bangladesh (BC), Pakistan (PC, PP)                                                                                       | 30 EOS, 15 LOS, 11 ND   | 24 nrd, 16 deceased, 16 ND  | ST1621                                                                   | ST1621, ST1622, ST1623                                         | N/A                                                                                | N/A                                                                                                                      | N/A                                                                                                                                                                                                                      | CAZ=4, TZP=3, MEM=3, LVX=8                                | N/A                                                  | Invasion, secretion systems                                                                    |
| <i>Escherichia coli</i>           | n=75, n=74   | Bangladesh (BC), Ethiopia (ES), India (IN), Nigeria (NK, NN, NW), Pakistan (PC, PP), Rwanda (RK, RU), South Africa (ZAT) | 27 EOS, 40 LOS, 8 ND    | 50 nrd, 18 deceased, 7 ND   | ST10, ST69, ST131, ST167, ST405, ST410                                   | N/A                                                            | phylogroup A, B2, and B1 most common, OH serotype very diverse                     | <i>bla</i> <sub>CTX-M-15</sub> , <i>bla</i> <sub>TEM</sub>                                                               | <i>bla</i> <sub>OXA-181</sub> , <i>bla</i> <sub>NDM-5</sub>                                                                                                                                                              | GEN=15, AMP=60, CTX=29, TZP=8, CAZ=25                     | Col, FII, FIB                                        | Adherence, iron uptake, protectins, toxins                                                     |
| <i>Enterobacter cloacae</i>       | n=57         | Bangladesh (BC), Nigeria (NK, NN, NW), Pakistan (PP), Rwanda (RK, RU)                                                    | 21 EOS, 29 LOS, 7 ND    | 39 nrd, 13 deceased, 5 ND   | ST84, ST346, ST523                                                       | ST1236, ST1238, ST1239, ST1240, ST1241, ST1243, ST1244, ST1245 | N/A                                                                                | <i>bla</i> <sub>CTX-M-15</sub> , <i>bla</i> <sub>GES-1</sub> , <i>bla</i> <sub>TEM</sub>                                 | <i>bla</i> <sub>OXA-232</sub> , <i>bla</i> <sub>NDM-7</sub> , <i>bla</i> <sub>NDM-20</sub>                                                                                                                               | MEM=10, FEP=34, CAZ=40, IPM=12, CRO=40                    | X3, Col, FIB, HI2                                    | N/A                                                                                            |
| <i>Enterobacter</i> spp.          | n=23, n=22   | Nigeria (NK), Pakistan (PP), Rwanda (RK, RU), South Africa (ZAT)                                                         | 11 EOS, 10 LOS, 2 ND    | 9 nrd, 4 deceased, 10 ND    | ST93, ST171                                                              | ST1237, ST1242, ST1245, ST1246, ST1248                         | N/A                                                                                | <i>bla</i> <sub>CTX-M-15</sub> , <i>bla</i> <sub>TEM</sub>                                                               | <i>bla</i> <sub>NDM-1</sub> , <i>bla</i> <sub>NDM-3</sub> , <i>bla</i> <sub>NDM-7</sub>                                                                                                                                  | MEM=7, FEP=3, CAZ=15, IPM=7, CRO=16                       | X3, Col, FIB                                         | N/A                                                                                            |
| <i>Klebsiella michiganensis</i>   | n=117, n=116 | Ethiopia (ES), Pakistan (PC, PP)                                                                                         | 62 EOS, 21 LOS, 34 ND   | 49 nrd, 38 deceased, 30 ND  | ST180                                                                    | ST243, ST244, ST268                                            | O1v1:KL74 serotype dominant                                                        | <i>bla</i> <sub>CTX-M-15</sub> , <i>bla</i> <sub>TEM</sub>                                                               | <i>bla</i> <sub>NDM-1</sub>                                                                                                                                                                                              | CRO=110, CST=7, AMK=5, CIP=15, MEM=0                      | FIB                                                  | N/A                                                                                            |
| <i>Klebsiella pneumoniae</i>      | n=258, n=254 | Bangladesh (BC, BK), Ethiopia (ES), India (IN), Nigeria (NK, NN, NW), Pakistan (PC, PP)                                  | 125 EOS, 118 LOS, 15 ND | 157 nrd, 58 deceased, 43 ND | ST115, ST117, ST35, ST37, ST39, ST218, ST307, ST348, ST442, ST464, ST985 | ST4408, ST4410, ST4411                                         | O1v1, O1v2, O4 dominant O-serotype. KL102, KL108, KL112, KL15 dominant KL-serotype | <i>bla</i> <sub>CTX-M-9</sub> , <i>bla</i> <sub>CTX-M-15</sub> , <i>bla</i> <sub>SHV-1</sub> , <i>bla</i> <sub>TEM</sub> | <i>bla</i> <sub>OXA-181</sub> , <i>bla</i> <sub>OXA-232</sub> , <i>bla</i> <sub>NDM-5</sub> , <i>bla</i> <sub>NDM-7</sub> , <i>bla</i> <sub>NDM-16</sub>                                                                 | CRO=230, CST=7, AMK=223, CIP=140, MEM=37                  | FIB, FIIK, R, X3                                     | <i>ybt</i> only, <i>iuc</i> and/or <i>iro</i> , <i>ybt</i> with <i>icu</i> and/or <i>iro</i> . |
| <i>Klebsiella quasipneumoniae</i> | n=13         | Bangladesh (BC, BK), Ethiopia (ES), India (IN), Nigeria (NK, NN), Pakistan (PP)                                          | 3 EOS, 10 LOS           | 8 nrd, 1 deceased, 4 ND     | ST736, ST4405                                                            | ST4405, ST4406, ST4407, ST4409                                 | O3/O3a, O5, O12 dominant O-serotype. KL126, KL53 dominant KL-serotypes             | <i>bla</i> <sub>CTX-M-15</sub> , <i>bla</i> <sub>VEB-1</sub> , <i>bla</i> <sub>SHV-1</sub> , <i>bla</i> <sub>TEM</sub>   | <i>bla</i> <sub>OXA-181</sub> , <i>bla</i> <sub>KPC-2</sub> , <i>bla</i> <sub>NDM-1</sub> , <i>bla</i> <sub>NDM-7</sub>                                                                                                  | CRO=10, CST=1, AMK=5, CIP=8 (plus 1 I), MEM= 2 (plus 1 I) | FIA, FIB, HI1, X3                                    | N/A                                                                                            |
| <i>Klebsiella variicola</i>       | n=5          | Bangladesh (BC), Rwanda (RK, RU), Pakistan (PP)                                                                          | 4 EOS, 1 LOS            | 3 nrd, 1 deceased, 1 ND     | All different                                                            | ST4404, ST4412, ST4413, ST4414                                 | O2v2 dominant O-serotype. KL all different                                         | <i>bla</i> <sub>CTX-M-15</sub> , <i>bla</i> <sub>SHV-1</sub> , <i>bla</i> <sub>TEM</sub>                                 | N/A                                                                                                                                                                                                                      | CRO=2, CST=0, AMK=0, CIP=1, MEM=0                         | FIB                                                  | N/A                                                                                            |
| <i>Pseudomonas aeruginosa</i>     | n=23, n=21   | Bangladesh (BC, BK), India (IN), Nigeria (NK, NN), Pakistan (PC, PP), Rwanda (RK)                                        | 12 EOS, 8 LOS, 3 ND     | 18 nrd, 3 deceased, 2 ND    | ST235, ST1285, ST3311                                                    | ST3311                                                         | N/A                                                                                | <i>bla</i> <sub>VIM-1</sub> , <i>bla</i> <sub>VEB-1</sub>                                                                | N/A                                                                                                                                                                                                                      | MEM=3, CAZ=18, CTX=21, TZP=4, AMK=5                       | N/A                                                  | Adherence, antiphagocytosis, iron uptake, secretion systems, quorum sensing                    |
| <i>Pseudomonas</i> spp.           | n=12, n=12   | Bangladesh (BC), Ethiopia (ES), Nigeria (NK, NN), Pakistan (PP)                                                          | 5 EOS, 6 LOS, 1 ND      | 9 nrd, 1 deceased, 2 ND     | N/A                                                                      | N/A                                                            | N/A                                                                                | N/A                                                                                                                      | N/A                                                                                                                                                                                                                      | MEM=1, CAZ=5, CTX=9, TZP=4, AMK=1 (I)                     | N/A                                                  | Adherence, iron uptake, secretion systems, quorum sensing                                      |
| <i>Ralstonia mannitolilytica</i>  | n=20, n=18   | Nigeria (NK, NN, NW)                                                                                                     | 16 EOS, 3 LOS, 1 ND     | 16 nrd, 2 deceased, 2 ND    | N/A                                                                      | N/A                                                            | N/A                                                                                | N/A                                                                                                                      | N/A                                                                                                                                                                                                                      | MEM=14, TZP=10, GEN=16, AMK=16, CST=15                    | N/A                                                  | N/A                                                                                            |
| <i>Salmonella enterica</i>        | n=7, n=6     | Nigeria (NK, NN)                                                                                                         | 2 EOS, 7 LOS            | 6 nrd, 1 deceased           | ST313 ( <i>Typhimurium</i> )                                             | N/A                                                            | <i>Typhimurium</i> dominant serotype                                               | <i>bla</i> <sub>CTX-M-15</sub> , <i>bla</i> <sub>TEM</sub>                                                               | N/A                                                                                                                                                                                                                      | AMP=4, AMC=3, CRO=1, CTX=1, MEM=0                         | Col FII5, FIB                                        | N/A                                                                                            |
| <i>Serratia marcescens</i>        | n=151, n=149 | Bangladesh (BC), Nigeria (NN), Pakistan (PP), Rwanda (RK, RU), South Africa (ZAT)                                        | 50 EOS, 89 LOS, 12 ND   | 100 nrd, 17 deceased, 34 ND | N/A                                                                      | N/A                                                            | N/A                                                                                | <i>bla</i> <sub>CTX-M-15</sub> , <i>bla</i> <sub>TEM</sub>                                                               | <i>bla</i> <sub>OXA-48</sub> , <i>bla</i> <sub>NDM-1</sub>                                                                                                                                                               | AMK=23, CAZ=122, CTX=126, GEN=114, MEM=15                 | HI2, X3 - identified from isolates not within clonal | Iron uptake                                                                                    |

nrd= not reported deceased

Supplementary table 3 - Estimated odds ratios from univariate logistic regression analyses using wald test. Significance was taken as p-value  $\leq 0.05$ . AMR and ARG scores were treated as covariates and remaining predictor variables were treated as factors. For species groups, only groups with  $n \geq 50$  isolates were included. Antibiotic resistance genes were not found among *B. cenocepacia* isolates ( $n=57$ ) with our methods, thus these were not included in the analyses.

| Outcome                                                      | Bacterial isolates causing sepsis | Phenotypic / genotypic predictor variables                                                                                                                    | p values | Odds ratio | 95% CI (upper value) |
|--------------------------------------------------------------|-----------------------------------|---------------------------------------------------------------------------------------------------------------------------------------------------------------|----------|------------|----------------------|
| Onset of sepsis (LOS as response, EOS as reference category) | Overall isolates                  | Intercept                                                                                                                                                     | 0.966    | 1.006      | 1.306                |
|                                                              |                                   | AMR score = number of antibiotics each isolate was resistant to                                                                                               | 0.858    | 1.002      | 1.029                |
|                                                              | <i>E. coli</i>                    | Intercept                                                                                                                                                     | 0.677    | 1.179      | 2.553                |
|                                                              |                                   | AMR score = number of antibiotics each isolate was resistant to                                                                                               | 0.461    | 1.046      | 1.179                |
|                                                              | <i>K. pneumoniae</i>              | Intercept                                                                                                                                                     | 0.797    | 1.116      | 2.589                |
|                                                              |                                   | AMR score = number of antibiotics each isolate was resistant to                                                                                               | 0.680    | 0.985      | 1.058                |
|                                                              | GNB isolates                      | Intercept                                                                                                                                                     | 1.000    | 1.000      | 1.255                |
|                                                              |                                   | Resistance to ampicillin and gentamicin                                                                                                                       | 1.000    | 1.000      | 1.334                |
|                                                              | <i>E. coli</i>                    | Intercept                                                                                                                                                     | 0.338    | 1.304      | 2.245                |
|                                                              |                                   | Resistance to ampicillin and gentamicin                                                                                                                       | 0.319    | 1.917      | 6.897                |
|                                                              | <i>K. pneumoniae</i>              | Intercept                                                                                                                                                     | 0.198    | 1.533      | 2.939                |
|                                                              |                                   | Resistance to ampicillin and gentamicin                                                                                                                       | 0.110    | 0.562      | 1.139                |
|                                                              | GNB isolates                      | Intercept                                                                                                                                                     | 0.237    | 0.875      | 1.092                |
|                                                              |                                   | Concomitant resistance to the three cephalosporins tested                                                                                                     | 0.127    | 1.250      | 1.663                |
|                                                              | <i>E. coli</i>                    | Intercept                                                                                                                                                     | 0.260    | 1.381      | 2.421                |
|                                                              |                                   | Concomitant resistance to the three cephalosporins tested                                                                                                     | 0.627    | 1.328      | 4.161                |
|                                                              | <i>K. pneumoniae</i>              | Intercept                                                                                                                                                     | 0.079    | 2.125      | 4.924                |
|                                                              |                                   | Concomitant resistance to the three cephalosporins tested                                                                                                     | 0.045    | 0.405      | 0.979                |
|                                                              | GNB isolates                      | Intercept                                                                                                                                                     | 0.029    | 1.481      | 2.105                |
|                                                              |                                   | Resistance to at least one of the three cephalosporins tested                                                                                                 | 0.017    | 0.626      | 0.918                |
|                                                              | <i>E. coli</i>                    | Intercept                                                                                                                                                     | 0.332    | 1.375      | 2.618                |
|                                                              |                                   | Resistance to at least one of the three cephalosporins tested                                                                                                 | 0.730    | 1.190      | 3.198                |
|                                                              | <i>K. pneumoniae</i>              | Intercept                                                                                                                                                     | 0.232    | 1.833      | 4.957                |
|                                                              |                                   | Resistance to at least one of the three cephalosporins tested                                                                                                 | 0.174    | 0.490      | 1.370                |
|                                                              | GNB isolates                      | Intercept                                                                                                                                                     | 0.605    | 1.046      | 1.238                |
|                                                              |                                   | Resistance to ertapenem, as a marker for resistance to carbapenems                                                                                            | 0.357    | 0.868      | 1.173                |
|                                                              | <i>E. coli</i>                    | Intercept                                                                                                                                                     | 0.206    | 1.385      | 2.293                |
|                                                              |                                   | Resistance to ertapenem, as a marker for resistance to carbapenems                                                                                            | 0.355    | 2.889      | 27.371               |
|                                                              | <i>K. pneumoniae</i>              | Intercept                                                                                                                                                     | 0.226    | 0.832      | 1.121                |
|                                                              |                                   | Resistance to ertapenem, as a marker for resistance to carbapenems                                                                                            | 0.114    | 1.589      | 2.823                |
|                                                              | Overall isolates                  | Intercept                                                                                                                                                     | 0.283    | 0.886      | 1.105                |
|                                                              |                                   | ARG score = number of antibiotic resistance genes carried by each isolate                                                                                     | 0.186    | 1.014      | 1.036                |
|                                                              | <i>E. cloacae</i>                 | Intercept                                                                                                                                                     | 0.011    | 4.370      | 13.690               |
|                                                              |                                   | ARG score = number of antibiotic resistance genes carried by each isolate                                                                                     | 0.016    | 0.868      | 0.974                |
|                                                              | <i>K. michiganensis</i>           | Intercept                                                                                                                                                     | 0.007    | 0.378      | 0.765                |
|                                                              |                                   | ARG score = number of antibiotic resistance genes carried by each isolate                                                                                     | 0.676    | 0.966      | 1.137                |
|                                                              | Others                            | Intercept                                                                                                                                                     | 0.007    | 0.378      | 0.765                |
|                                                              |                                   | ARG score = number of antibiotic resistance genes carried by each isolate                                                                                     | 0.676    | 0.966      | 1.137                |
|                                                              | <i>S. marcescens</i>              | Intercept                                                                                                                                                     | 0.634    | 1.257      | 3.222                |
|                                                              |                                   | ARG score = number of antibiotic resistance genes carried by each isolate                                                                                     | 0.439    | 1.045      | 1.169                |
|                                                              | <i>E. coli</i>                    | Intercept                                                                                                                                                     | 0.531    | 0.656      | 2.453                |
|                                                              |                                   | ARG score = number of antibiotic resistance genes carried by each isolate                                                                                     | 0.197    | 1.096      | 1.260                |
|                                                              | <i>K. pneumoniae</i>              | Intercept                                                                                                                                                     | 0.052    | 2.224      | 4.980                |
|                                                              |                                   | ARG score = number of antibiotic resistance genes carried by each isolate                                                                                     | 0.028    | 0.943      | 0.994                |
|                                                              | <i>K. pneumoniae</i>              | Intercept (Kleborate virulence score = 0; none of the acquired virulence loci, i.e., negative for all of yersiniabactin, colibactin, aerobactin, salmochelin) | 0.493    | 0.889      | 1.245                |
|                                                              |                                   | Kleborate virulence score = 3 and 4 (presence of aerobactin and/or salmochelin with/without yersiniabactin (without colibactin))                              | 0.040    | 0.113      | 0.903                |
|                                                              |                                   | Kleborate virulence score = 1 (presence of yersiniabactin only)                                                                                               | 0.222    | 1.387      | 2.343                |

|                                                                                |                         |                                                                                                                                                               |       |        |        |
|--------------------------------------------------------------------------------|-------------------------|---------------------------------------------------------------------------------------------------------------------------------------------------------------|-------|--------|--------|
| Mortality following sepsis (deceased as response, alive as reference category) | Overall isolates        |                                                                                                                                                               |       |        |        |
|                                                                                |                         | Intercept                                                                                                                                                     | 0.000 | 0.372  | 0.507  |
|                                                                                |                         | AMR score = number of antibiotics each isolate was resistant to                                                                                               | 0.254 | 0.982  | 1.013  |
|                                                                                | <i>E. coli</i>          |                                                                                                                                                               |       |        |        |
|                                                                                |                         | Intercept                                                                                                                                                     | 0.005 | 0.281  | 0.689  |
|                                                                                |                         | AMR score = number of antibiotics each isolate was resistant to                                                                                               | 0.448 | 1.050  | 1.190  |
|                                                                                | <i>K. pneumoniae</i>    |                                                                                                                                                               |       |        |        |
|                                                                                |                         | Intercept                                                                                                                                                     | 0.022 | 0.310  | 0.842  |
|                                                                                |                         | AMR score = number of antibiotics each isolate was resistant to                                                                                               | 0.762 | 1.013  | 1.102  |
|                                                                                | GNB isolates            |                                                                                                                                                               |       |        |        |
|                                                                                |                         | Intercept                                                                                                                                                     | 0.000 | 0.443  | 0.571  |
|                                                                                |                         | Resistance to ampicillin and gentamicin                                                                                                                       | 0.007 | 0.627  | 0.883  |
|                                                                                | <i>E. coli</i>          |                                                                                                                                                               |       |        |        |
|                                                                                |                         | Intercept                                                                                                                                                     | 0.000 | 0.325  | 0.608  |
|                                                                                |                         | Resistance to ampicillin and gentamicin                                                                                                                       | 0.404 | 1.709  | 6.024  |
|                                                                                | <i>K. pneumoniae</i>    |                                                                                                                                                               |       |        |        |
|                                                                                |                         | Intercept                                                                                                                                                     | 0.061 | 0.500  | 1.031  |
|                                                                                |                         | Resistance to ampicillin and gentamicin                                                                                                                       | 0.329 | 0.672  | 1.493  |
|                                                                                | GNB isolates            |                                                                                                                                                               |       |        |        |
|                                                                                |                         | Intercept                                                                                                                                                     | 0.000 | 0.448  | 0.571  |
|                                                                                |                         | Concomitant resistance to the three cephalosporins tested                                                                                                     | 0.003 | 0.593  | 0.833  |
|                                                                                | <i>E. coli</i>          |                                                                                                                                                               |       |        |        |
|                                                                                |                         | Intercept                                                                                                                                                     | 0.001 | 0.324  | 0.622  |
|                                                                                |                         | Concomitant resistance to the three cephalosporins tested                                                                                                     | 0.471 | 1.542  | 5.000  |
|                                                                                | <i>K. pneumoniae</i>    |                                                                                                                                                               |       |        |        |
|                                                                                |                         | Intercept                                                                                                                                                     | 0.056 | 0.444  | 1.022  |
|                                                                                |                         | Concomitant resistance to the three cephalosporins tested                                                                                                     | 0.592 | 0.783  | 1.916  |
|                                                                                | GNB isolates            |                                                                                                                                                               |       |        |        |
|                                                                                |                         | Intercept                                                                                                                                                     | 0.000 | 0.434  | 0.641  |
|                                                                                |                         | Resistance to at least one of the three cephalosporins tested                                                                                                 | 0.173 | 0.739  | 1.141  |
|                                                                                | <i>E. coli</i>          |                                                                                                                                                               |       |        |        |
|                                                                                |                         | Intercept                                                                                                                                                     | 0.004 | 0.333  | 0.709  |
|                                                                                |                         | Resistance to at least one of the three cephalosporins tested                                                                                                 | 0.711 | 1.227  | 3.621  |
|                                                                                | <i>K. pneumoniae</i>    |                                                                                                                                                               |       |        |        |
|                                                                                |                         | Intercept                                                                                                                                                     | 0.144 | 0.455  | 1.308  |
|                                                                                |                         | Resistance to at least one of the three cephalosporins tested                                                                                                 | 0.649 | 0.774  | 2.334  |
|                                                                                | GNB isolates            |                                                                                                                                                               |       |        |        |
|                                                                                |                         | Intercept                                                                                                                                                     | 0.000 | 0.328  | 0.403  |
|                                                                                |                         | Resistance to ertapenem, as a marker for resistance to carbapenems                                                                                            | 0.592 | 1.104  | 1.585  |
|                                                                                | <i>E. coli</i>          |                                                                                                                                                               |       |        |        |
|                                                                                |                         | Intercept                                                                                                                                                     | 0.000 | 0.348  | 0.614  |
|                                                                                |                         | Resistance to ertapenem, as a marker for resistance to carbapenems                                                                                            | 0.497 | 1.917  | 12.529 |
|                                                                                | <i>K. pneumoniae</i>    |                                                                                                                                                               |       |        |        |
|                                                                                |                         | Intercept                                                                                                                                                     | 0.000 | 0.310  | 0.453  |
|                                                                                |                         | Resistance to ertapenem, as a marker for resistance to carbapenems                                                                                            | 0.166 | 1.577  | 3.005  |
|                                                                                | GPB isolates            |                                                                                                                                                               |       |        |        |
|                                                                                |                         | Intercept                                                                                                                                                     | 0.000 | 0.175  | 0.331  |
|                                                                                |                         | Resistance to methicillin                                                                                                                                     | 0.371 | 1.562  | 4.147  |
|                                                                                | Overall isolates        |                                                                                                                                                               |       |        |        |
|                                                                                |                         | Intercept                                                                                                                                                     | 0.000 | 0.385  | 0.498  |
|                                                                                |                         | ARG score = number of antibiotic resistance genes carried by each isolate                                                                                     | 0.137 | 0.980  | 1.006  |
|                                                                                | <i>E. cloacae</i>       |                                                                                                                                                               |       |        |        |
|                                                                                |                         | Intercept                                                                                                                                                     | 0.163 | 0.457  | 1.372  |
|                                                                                |                         | ARG score = number of antibiotic resistance genes carried by each isolate                                                                                     | 0.509 | 0.962  | 1.078  |
|                                                                                | <i>K. michiganensis</i> |                                                                                                                                                               |       |        |        |
|                                                                                |                         | Intercept                                                                                                                                                     | 0.289 | 1.464  | 2.965  |
|                                                                                |                         | ARG score = number of antibiotic resistance genes carried by each isolate                                                                                     | 0.058 | 0.812  | 1.007  |
|                                                                                | Others                  |                                                                                                                                                               |       |        |        |
|                                                                                |                         | Intercept                                                                                                                                                     | 0.013 | 0.354  | 0.804  |
|                                                                                |                         | ARG score = number of antibiotic resistance genes carried by each isolate                                                                                     | 0.256 | 0.879  | 1.098  |
|                                                                                | <i>S. marcescens</i>    |                                                                                                                                                               |       |        |        |
|                                                                                |                         | Intercept                                                                                                                                                     | 0.087 | 0.353  | 1.162  |
|                                                                                |                         | ARG score = number of antibiotic resistance genes carried by each isolate                                                                                     | 0.204 | 0.907  | 1.054  |
|                                                                                | <i>E. coli</i>          |                                                                                                                                                               |       |        |        |
|                                                                                |                         | Intercept                                                                                                                                                     | 0.176 | 0.350  | 1.601  |
|                                                                                |                         | ARG score = number of antibiotic resistance genes carried by each isolate                                                                                     | 0.969 | 1.003  | 1.169  |
|                                                                                | <i>K. pneumoniae</i>    |                                                                                                                                                               |       |        |        |
|                                                                                |                         | Intercept                                                                                                                                                     | 0.303 | 0.614  | 1.553  |
|                                                                                |                         | ARG score = number of antibiotic resistance genes carried by each isolate                                                                                     | 0.262 | 0.965  | 1.027  |
|                                                                                | <i>K. pneumoniae</i>    |                                                                                                                                                               |       |        |        |
|                                                                                |                         | Intercept (Kleborate virulence score = 0; none of the acquired virulence loci, i.e., negative for all of yersiniabactin, colibactin, aerobactin, salmochelin) | 0.000 | 0.290  | 0.446  |
|                                                                                |                         | Kleborate virulence score = 3 and 4 (presence of aerobactin and/or salmochelin with/without yersiniabactin (without colibactin))                              | 0.001 | 13.778 | 68.765 |
|                                                                                |                         | Kleborate virulence score = 1 (presence of yersiniabactin only)                                                                                               | 0.454 | 1.278  | 2.429  |

Supplementary Table 5a – Terms used for literature search for WGS datasets of *Klebsiella pneumoniae*, *Escherichia coli* and *Staphylococcus aureus* isolates (n= number of hits on PubMed October 2019)

|                                                                                |
|--------------------------------------------------------------------------------|
| Global genomic species diversity <i>Escherichia coli</i> (n=28)                |
| Global genomic species diversity <i>Staphylococcus aureus</i> (n=11)           |
| Global genomic species diversity <i>Klebsiella pneumoniae</i> (n=10)           |
| <i>Escherichia coli</i> global distribution whole genome sequencing (n=15)     |
| <i>Staphylococcus aureus</i> global distribution whole genome sequencing (n=1) |
| <i>Klebsiella pneumoniae</i> global distribution whole genome sequencing (n=5) |
| Genomic diversity <i>Escherichia coli</i> (n=3527)                             |
| Genomic diversity <i>Staphylococcus aureus</i> (n=680)                         |
| Genomic diversity <i>Klebsiella pneumoniae</i> (n=266)                         |
| Whole genome sequencing surveillance <i>Escherichia coli</i> (n=290)           |
| Whole genome sequencing surveillance <i>Staphylococcus aureus</i> (n=194)      |
| Whole genome sequencing surveillance <i>Klebsiella pneumoniae</i> (n=166)      |

Supplementary Table 5b – Terms used for literature search for neonatal/infant sepsis studies with WGS available for *K. pneumoniae*, *E. coli* and *S. aureus* isolates (n= number of hits on PubMed August 2019)

|                                                                                   |
|-----------------------------------------------------------------------------------|
| Infant sepsis <2 months whole genome sequencing (n=27)                            |
| <i>Klebsiella pneumoniae</i> neonatal infant sepsis whole genome sequencing (n=2) |
| <i>Escherichia coli</i> neonatal infant sepsis whole genome sequencing (n=4)      |
| <i>Staphylococcus aureus</i> neonatal infant sepsis whole genome sequencing (n=2) |
| neonatal sepsis genomics (n=46)                                                   |
| infant sepsis genomics (n=53)                                                     |
| blood culture positive genomics (n=56)                                            |
| neonatal blood culture positive whole genome (n=3)                                |
| infant blood culture positive whole genome (n=2)                                  |
| <i>Escherichia coli</i> sepsis whole genome sequencing (n=27)                     |
| <i>Staphylococcus aureus</i> sepsis whole genome sequencing (n=31)                |
| <i>Klebsiella pneumoniae</i> sepsis whole genome sequencing (n=13)                |
| Gram negative sepsis whole genome genomics (n=32)                                 |
| Gram positive sepsis whole genome genomics (n=27)                                 |
| Sepsis nanopore (n=6)                                                             |
| Sepsis PacBio (n=4)                                                               |
| Sepsis Illumina whole genome (n=18)                                               |
| Bloodstream infection neonates genome sequencing (n=46)                           |

Supplementary Table 6 - Ethics committees and reference numbers

| Site | committees                                                                                                                                                                             | Named PI               | Reference(s)                              | Approval date(s)          |
|------|----------------------------------------------------------------------------------------------------------------------------------------------------------------------------------------|------------------------|-------------------------------------------|---------------------------|
| BC   | Ethical Review Committee, Bangladesh Institute of Child Health                                                                                                                         | Samir Kumar Saha       | BICH-ERC-4/3/2015                         | 15/09/2015                |
| BK   | Ethical Review Committee, Bangladesh Institute of Child Health                                                                                                                         | Samir Kumar Saha       | BICH-ERC-4/3/2015                         | 15/09/2015                |
| ES   | Boston Children's Hospital                                                                                                                                                             | Grace Chan             | IRB-P00023058                             | 11/08/2016                |
| IN   | Institutional Ethics Committee, National Institute of Cholera and Enteric Diseases and Institute of Post Graduate Medical Education and Research, IPGME&R Research Oversight Committee | Sulagna Basu           | A-1/2016-IEC and Inst/IEC/2016/508        | 17/11/2016 and 04/11/2016 |
| NK   | Kano State Hospitals Management Board                                                                                                                                                  | Kenneth Iregbu         | 8/10/1437AH                               | 13/07/2016                |
| NN   | Health Research Ethics Committee (HREC), National Hospital, Abuja                                                                                                                      | Kenneth Iregbu         | NHA/EC/017/2015                           | 27/04/2015                |
| NW   | Health Research Ethics Committee (HREC), National Hospital, Abuja                                                                                                                      | Kenneth Iregbu         | NHA/EC/017/2015                           | 27/04/2015                |
| PC   | Shaheed Zulfiqar Ali Bhutto Medical University, Pakistan Institute of Medical Sciences (PIMS) Islamabad                                                                                | Rabaab Zahra           | NA, signed letter from Prof. Tabish Hazir | 27/05/2015                |
| PP   | Shaheed Zulfiqar Ali Bhutto Medical University, Pakistan Institute of Medical Sciences (PIMS) Islamabad                                                                                | Rabaab Zahra           | NA, signed letter from Prof. Tabish Hazir | 27/05/2015                |
| RK   | Republic of Rwanda, National Ethics Committee                                                                                                                                          | Jean-Baptiste Mazarati | No342/RNEC/2015                           | 10/11/2015                |
| RU   | Republic of Rwanda, National Ethics Committee                                                                                                                                          | Jean-Baptiste Mazarati | No342/RNEC/2015                           | 10/11/2015                |
| ZAT  | Stellenbosch University and Tygerberg Hospital, Research projects, Western Cape Government                                                                                             | Shaheen Mehtar         | N15/07/063                                | 04/12/2015 and 02/02/2016 |

Supplementary Table 7 - panel and concentration of antibiotics tested for GNB, b) AMR phenotypic scores, c) additional quality control strains used in MIC tests.

| <b>a) GNB</b>                                                  |                                                            |                                              |                                                |                                                                                         |
|----------------------------------------------------------------|------------------------------------------------------------|----------------------------------------------|------------------------------------------------|-----------------------------------------------------------------------------------------|
| <b>Antibiotic</b>                                              | <b>Solvent</b>                                             | <b>Concentration (µg/ml) ranges tested</b>   | <b>Additional notes</b>                        |                                                                                         |
| Amikacin                                                       | base; sterile dH2O                                         | 0, 4, 8, 16, 32                              |                                                |                                                                                         |
| Amoxicillin/Clavulanate                                        | saturated NaHCO3 solution or DMSO /potassium; sterile dH2O | 0, 4, 8, 16, 32                              | Clavulanate 2mg/L; 175µl per 35ml MHAI plate   |                                                                                         |
| Ampicillin                                                     | saturated NaHCO3 solution                                  | 0, 4, 8, 16, 32                              |                                                |                                                                                         |
| Aztreonam                                                      | anhydrous crystalline B form; saturated NaHCO3 solution    | 0, 0.5, 1, 2, 4                              |                                                |                                                                                         |
| Cefepime                                                       | dihydrochloride; sterile dH2O                              | 0, 0.5, 1, 2, 4                              |                                                |                                                                                         |
| Cefotaxime                                                     | sterile dH2O                                               | 0, 0.5, 1, 2, 4                              |                                                |                                                                                         |
| Ceftazidime                                                    | sterile dH2O                                               | 0, 0.5, 1, 2, 4                              |                                                |                                                                                         |
| Ceftriaxone                                                    | disodium; sterile dH2O                                     | 0, 0.5, 1, 2, 4                              |                                                |                                                                                         |
| Ciprofloxacin                                                  | 0.1 HCl; sterile dH2O                                      | 0, 0.125, 0.25, 0.5, 1, 2                    |                                                |                                                                                         |
| Colistin                                                       | sterile dH2O                                               | 0, 1, 2, 4, 8                                |                                                |                                                                                         |
| Ertapenem                                                      | sterile dH2O                                               | 0, 0.25, 0.5, 1, 2                           |                                                |                                                                                         |
| Fosfomycin                                                     | calcium; sterile dH2O                                      | 0, 16, 32, 64, 128                           | 12.5mg Glucose-6-phosphate (G-C-P)/ 500ml MHAI |                                                                                         |
| Gentamicin                                                     | sulphate; sterile dH2O                                     | 0, 1, 2, 4, 8                                |                                                |                                                                                         |
| Imipenem                                                       | monohydrate; saturated NaHCO3 solution                     | 0, 1, 2, 4, 8                                |                                                |                                                                                         |
| Levofloxacin                                                   | hemihydrate; sterile dH2O                                  | 0, 0.5, 1, 2, 4                              |                                                |                                                                                         |
| Meropenem                                                      | trihydrate; sterile dH2O                                   | 0, 1, 2, 4, 8                                |                                                |                                                                                         |
| Piperacillin/Tazobactam                                        | sterile dH2O / saturated NaHCO3 solution                   | 0, 4, 8, 16, 32                              | Tazobactam 4mg/L; 175µl per 35ml MHAI plate    |                                                                                         |
| Tigecycline                                                    | sterile dH2O                                               | 0, 0.5, 1, 2, 4                              |                                                |                                                                                         |
| Tobramycin                                                     | sulphate; sterile dH2O                                     | 0, 1, 2, 4, 8                                |                                                |                                                                                         |
| <b>b) - AMR counts</b>                                         |                                                            |                                              |                                                |                                                                                         |
| <b>Phenotypic dataset</b>                                      | <b>Phenotypic metadata score</b>                           | <b>Definition</b>                            | <b>Score options</b>                           | <b>Interpretation</b>                                                                   |
| a)                                                             | carbapenem resistance                                      | resistance to meropenem                      | 0, 1                                           | 0= susceptible, 1= resistant to meropenem                                               |
| b)                                                             | ampicillin and gentamicin resistance                       | resistance to ampicillin and gentamicin      | 0, 1                                           | 0= susceptible, 1= resistance to both antibiotics                                       |
| c)                                                             | 3Gscore_OR                                                 | third generation cephalosporins score_OR     | 0, 1                                           | 0= susceptible, 1= resistance to at least one of ceftriaxone, cefotaxime or ceftazidime |
| d)                                                             | 3Gscore                                                    | third generation cephalosporins score        | 0, 1                                           | 0= susceptible, 1= concomitant resistance to ceftriaxone, cefotaxime and ceftazidime    |
| e)                                                             | AMR score                                                  | resistance to n= antibiotics                 | 0-20                                           | resistance to n=X antibiotics tested                                                    |
| <b>c) Additional quality control strains used in MIC tests</b> |                                                            |                                              |                                                |                                                                                         |
| <b>Strain code</b>                                             | <b>Species identification</b>                              | <b>Antibiotic; MIC (µg/ml)</b>               |                                                |                                                                                         |
| A70                                                            | <i>Pseudomonas aeruginosa</i>                              | Fosfomycin; 16/32                            |                                                |                                                                                         |
| IR60                                                           | <i>Escherichia coli</i>                                    | Tigecycline; 1                               |                                                |                                                                                         |
| IR35                                                           | <i>Klebsiella pneumoniae</i>                               | Ertapenem; >2 (highest concentration tested) |                                                |                                                                                         |
| 5737                                                           | <i>Escherichia coli</i>                                    | Cefotaxime; 4                                |                                                |                                                                                         |





Supplementary Table 9 - BARNARDS group consortium

| Country    | Forename        | Surname       | Position        | Affiliation                                                                                               |
|------------|-----------------|---------------|-----------------|-----------------------------------------------------------------------------------------------------------|
| Bangladesh | Samir           | Saha          | PI              | Chittagong Medical College Hospital, Bangladesh                                                           |
| Bangladesh | Maksuda         | Islam         | scientist       | Chittagong Medical College Hospital, Bangladesh                                                           |
| Bangladesh | Zabed           | Bin-Ahmed     | scientist       | Chittagong Medical College Hospital, Bangladesh                                                           |
| Bangladesh | Wazir           | Ahmed         | clinician       | Chittagong Medical College Hospital, Bangladesh                                                           |
| Bangladesh | Taslina         | Begum         | clinician       | Chittagong Medical College Hospital, Bangladesh                                                           |
| Bangladesh | Mitu            | Chowdhury     | scientist       | Chittagong Medical College Hospital, Bangladesh                                                           |
| Bangladesh | Shaila          | Sharmin       | scientist       | Chittagong Medical College Hospital, Bangladesh                                                           |
| Bangladesh | Chumki          | Rani Dey      | Research nurse  | Chittagong Medical College Hospital, Bangladesh                                                           |
| Bangladesh |                 | Uttam         | scientist       | Chittagong Medical College Hospital, Bangladesh                                                           |
| Bangladesh | Abdul           | Matin         | clinician       | Kumudini Women's Medical College, Bangladesh                                                              |
| Bangladesh | Sowmitra Ranjan | Chakraborty   | scientist       | Kumudini Women's Medical College, Bangladesh                                                              |
| Bangladesh | Sadia           | Tasmin        | clinician       | Kumudini Women's Medical College, Bangladesh                                                              |
| Bangladesh | Dipa            | Rema          | Research nurse  | Kumudini Women's Medical College, Bangladesh                                                              |
| Bangladesh | Rashida         | Khatun        | Research nurse  | Kumudini Women's Medical College, Bangladesh                                                              |
| Bangladesh | Liza            | Nath          | Research nurse  | Kumudini Women's Medical College, Bangladesh                                                              |
| Ethiopia   | Nigatu          | Balkachew     | clinician       | Department of Ob-Gyn, Saint Paul's Hospital Millennium Medical College                                    |
| Ethiopia   | Delayehu        | Bekele        | Co-PI           | Obstetrics and Gynaecology, Saint Paul's Hospital Millennium Medical College                              |
| Ethiopia   | Katherine       | Schaughency   | Data manager    | Saint Paul's Hospital Millennium Medical College                                                          |
| Ethiopia   | Semaria         | Solomon       | laboratory      | Department of Microbiology, Immunology and Parasitology, Saint Paul's Hospital Millennium Medical College |
| Ethiopia   | Zenebe          | Gebreyohanes  | laboratory      | Department of Microbiology, Immunology and Parasitology, Saint Paul's Hospital Millennium Medical College |
| Ethiopia   | Rozina          | Ambachew      | laboratory      | Department of Microbiology, Immunology and Parasitology, Saint Paul's Hospital Millennium Medical College |
| Ethiopia   | Oludare         | Odumade       | clinician       | Department of Pediatrics, Boston Children's Hospital Harvard Medical School                               |
| Ethiopia   | Misgana         | Haileselassie | nurse           | Saint Paul's Hospital Millennium Medical College                                                          |
| Ethiopia   | Grace           | Chan          | PI              | Paediatrics, Harvard Medical School                                                                       |
| Ethiopia   | Abigail         | Russo         | Project manager | Global Health Research Program Manager, Boston Children's Hospital                                        |
| Ethiopia   | Redeat          | Workneh       | Project manager | Department of Pediatrics and Child Health, Saint Paul's Hospital Millennium Medical College               |
| Ethiopia   | Gesit           | Metaferia     | clinician       | Department of Pediatrics, Saint Paul's Hospital Millennium Medical College                                |
| Ethiopia   | Mahlet          | Abayneh       |                 | Saint Paul's Hospital Millennium Medical College                                                          |
| Ethiopia   | Yahya Zekaria   | Mohammed      |                 | Birhan for Mothers and Children Program, Saint Paul's Hospital Millennium Medical College                 |
| Ethiopia   | Tefera          | Biteye        |                 | Birhan for Mothers and Children Program, Saint Paul's Hospital Millennium Medical College                 |
| Ethiopia   | Alula           | Teklu         | scientist       | Saint Paul's Hospital Millennium Medical College                                                          |
| Ethiopia   | Wendimagegn     | Gezahegn      | clinician       | Department of Pediatrics, Saint Paul's Hospital Millennium Medical College                                |
| India      | Partha Sarathi  | Chakravorty   | clinician       | Obstetrics & Gynecology, IPGMER & SSKM Hospital                                                           |

|         |                 |               |                     |                                                                                                        |
|---------|-----------------|---------------|---------------------|--------------------------------------------------------------------------------------------------------|
| India   | Anuradha        | Mukherjee     | clinician           | Division of Bacteriology, ICMR-National Institute of Cholera and Enteric Diseases,Kolkata-700010,India |
| India   | Ranjan Kumar    | Nandy         | Co-PI               | Scientist-F, Division of Bacteriology, ICMR-National Institute of Cholera and Enteric Diseases         |
| India   | Samarpan        | Roy           | Data entry operator | ICMR-National Institute of Cholera and Enteric Diseases                                                |
| India   | Anuradha        | Sinha         | Deputy manager      | R&D, Zydus Cadila                                                                                      |
| India   | Sharmi          | Naha          | laboratory          | ICMR-SRF, Division of Bacteriology, ICMR-National Institute of Cholera and Enteric Diseases            |
| India   | Sukla Saha      | Malakar       | laboratory          | ICMR-National Institute of Cholera and Enteric Diseases                                                |
| India   | Siddhartha      | Bose          | laboratory          | Medical Laboratory Technologist, Swasthya Bhawan                                                       |
| India   | Monaki          | Majhi         | laboratory          | Baruipur SD Hospital                                                                                   |
| India   | Subhasree       | Sahoo         | nurse               |                                                                                                        |
| India   | Putul           | Mukherjee     | nurse               |                                                                                                        |
| India   | Sumitra Kumari  | Routa         | nurse               |                                                                                                        |
| India   | Chaitali        | Nandi         | nurse               |                                                                                                        |
| India   | Sulagna         | Basu          | PI                  | Scientist F, Division of BacteriologyICMR-National Institute of Cholera and Enteric Diseases,          |
| India   | Bijan           | Saha          | scientist           | Neonatology, IPGMER & SSKM Hospital                                                                    |
| India   | Pinaki          | Chattopadhyay | scientist           | Neonatal Microbiology, IPGMER & SSKM Hospital                                                          |
| Nigeria | Fatima Zara Isa | Modibbo       | clinician           | 54gene                                                                                                 |
| Nigeria | Stella          | Uwaezuoke     | clinician           | Federal Medical Centre Jabi, Abuja, Nigeria                                                            |
| Nigeria | Dilichukwu      | Meduekwe      | clinician           | Wuse District Hospital, Nigeria                                                                        |
| Nigeria | Khairiyya       | Muhammad      | laboratory          | National Hospital Abuja, Nigeria                                                                       |
| Nigeria | Queen           | Nsude         | laboratory          | Wuse District Hospital, Nigeria                                                                        |
| Nigeria | Ifeoma          | Ukeh          | laboratory          | National Hospital Abuja, Nigeria                                                                       |
| Nigeria | Mary-Joe        | Okenu         | laboratory          | National Hospital Abuja, Nigeria                                                                       |
| Nigeria | Akpulu          | Chinenye      | laboratory          | 54gene                                                                                                 |
| Nigeria | Samuel          | Yakubu        | laboratory          | National Hospital Abuja, Nigeria                                                                       |
| Nigeria | Vivian          | Asunugwo      | laboratory          | Wuse District Hospital, Nigeria                                                                        |
| Nigeria | Folake          | Aina          | NYS Corp Member     | National Hospital Abuja, Nigeria                                                                       |
| Nigeria | Isibong         | Issy          | NYS Corp Member     | National Hospital Abuja, Nigeria                                                                       |
| Nigeria | Dolapo          | Adekeye       | NYS Corp Member     | National Hospital Abuja, Nigeria                                                                       |
| Nigeria | Adiele          | Eunice        | nurse               | Wuse District Hospital, Nigeria                                                                        |
| Nigeria | Abdulmlik       | Amina         | nurse               | Wuse District Hospital, Nigeria                                                                        |
| Nigeria | R               | Oyewole       | nurse               | National Hospital Abuja, Nigeria                                                                       |
| Nigeria | I               | Oloton        | nurse               | National Hospital Abuja, Nigeria                                                                       |
| Nigeria | BC              | Nnaji         | nurse               | National Hospital Abuja, Nigeria                                                                       |
| Nigeria | M               | Umejiego      | nurse               | National Hospital Abuja, Nigeria                                                                       |
| Nigeria | PN              | Anoke         | nurse               | National Hospital Abuja, Nigeria                                                                       |
| Nigeria | S               | Adebayo       | nurse               | National Hospital Abuja, Nigeria                                                                       |
| Nigeria | GO              | Abegunrin     | nurse               | National Hospital Abuja, Nigeria                                                                       |

|         |                |                   |           |                                                                    |
|---------|----------------|-------------------|-----------|--------------------------------------------------------------------|
| Nigeria | OB             | Omosho            | nurse     | National Hospital Abuja, Nigeria                                   |
| Nigeria | R              | Ibrahim           | nurse     | National Hospital Abuja, Nigeria                                   |
| Nigeria | B              | Igwe              | nurse     | National Hospital Abuja, Nigeria                                   |
| Nigeria | M              | Abroko            | nurse     | National Hospital Abuja, Nigeria                                   |
| Nigeria | K              | Balami            | nurse     | National Hospital Abuja, Nigeria                                   |
| Nigeria | L              | Bayem             | nurse     | National Hospital Abuja, Nigeria                                   |
| Nigeria | C              | Anyanwu           | nurse     | National Hospital Abuja, Nigeria                                   |
| Nigeria | H              | Haruna            | nurse     | National Hospital Abuja, Nigeria                                   |
| Nigeria | J              | Okike             | nurse     | National Hospital Abuja, Nigeria                                   |
| Nigeria | K              | Goroh             | nurse     | National Hospital Abuja, Nigeria                                   |
| Nigeria | M              | Boi-Sunday        | nurse     | National Hospital Abuja, Nigeria                                   |
| Nigeria | Augusta        | Ugafor            | nurse     | National Hospital Abuja, Nigeria                                   |
| Nigeria | Maryam         | Makama            | nurse     | National Hospital Abuja, Nigeria                                   |
| Nigeria | Kaniba         | Ndukwe            | nurse     | National Hospital Abuja, Nigeria                                   |
| Nigeria | Anastasia      | Odama             | nurse     | National Hospital Abuja, Nigeria                                   |
| Nigeria | Hadiza         | Yusuf             | nurse     | National Hospital Abuja, Nigeria                                   |
| Nigeria | Patience       | Wachukwu          | nurse     | National Hospital Abuja, Nigeria                                   |
| Nigeria | Kachalla       | Yahaya            | nurse     | National Hospital Abuja, Nigeria                                   |
| Nigeria | Titus          | Kalade<br>Colsons | nurse     | National Hospital Abuja, Nigeria                                   |
| Nigeria | Mercy          | Kura              | nurse     | National Hospital Abuja, Nigeria                                   |
| Nigeria | Damilola       | Orebiyi           | nurse     | National Hospital Abuja, Nigeria                                   |
| Nigeria | Kenneth C.     | Iregbu            | PI        | National Hospital Abuja, Nigeria                                   |
| Nigeria | Chukwuemeka    | Mmadueke          | clinician | Wuse District Hospital, Nigeria                                    |
| Nigeria | Lamidi         | Audu              | clinician | National Hospital Abuja, Nigeria                                   |
| Nigeria | Nura           | Idris             | clinician | Director Kano State Health Trust Fund                              |
| Nigeria | Safiya         | Gambo             | clinician | Murtala Muhammad Specialist Hospital, Nigeria                      |
| Nigeria | Jamila         | Ibrahim           | clinician | Department of paediatric Muhammad Abdullahi Wase Teaching Hospital |
| Nigeria | Edwin          | Precious          | scientist | Department of Microbiology Aminu Kano Teaching Hospital            |
| Nigeria | Ashiru         | Hassan            |           | Murtala Muhammad Specialist Hospital, Nigeria                      |
| Nigeria | Shamsudden     | Gwadabe           | scientist | Department of Physiology NorthWest University Kano                 |
| Nigeria | Adeola         | Adeleye<br>Falola | scientist | 54gene                                                             |
| Nigeria | Muhammad       | Aliyu             | scientist | Murtala Muhammad Specialist Hospital, Nigeria                      |
| Nigeria | Amina          | Ibrahim           | scientist | Murtala Muhammad Specialist Hospital, Nigeria                      |
| Nigeria | Aisha Sani     | Mukaddas          | scientist | Murtala Muhammad Specialist Hospital, Nigeria                      |
| Nigeria | Rashida Yakubu | Khalid            | scientist | Murtala Muhammad Specialist Hospital, Nigeria                      |
| Nigeria | Fatima Ibrahim | Alkali            | scientist | Murtala Muhammad Specialist Hospital, Nigeria                      |

|          |                   |                |                       |                                                                                |
|----------|-------------------|----------------|-----------------------|--------------------------------------------------------------------------------|
| Nigeria  | Maryam Yahaya     | Muhammad       | scientist             | Murtala Muhammad Specialist Hospital, Nigeria                                  |
| Nigeria  | Fatima Mohammad   | Tukur          | scientist             | Murtala Muhammad Specialist Hospital, Nigeria                                  |
| Nigeria  | Surayya Mustapha  | Muhammad       | scientist             | Department of Biotechnology Federal University Dutse                           |
| Nigeria  | Adeola            | Shittu         | scientist             | Murtala Muhammad Specialist Hospital, Nigeria                                  |
| Nigeria  | Murjanatu         | Bello          | scientist             | Murtala Muhammad Specialist Hospital, Nigeria                                  |
| Nigeria  | Muhammad Abubakar | Hassan         | scientist             | Murtala Muhammad Specialist Hospital, Nigeria                                  |
| Nigeria  | Fatima Habib      | Sa ad          | scientist             | Murtala Muhammad Specialist Hospital, Nigeria                                  |
| Nigeria  | Aishatu           | Kassim         | scientist             | Murtala Muhammad Specialist Hospital, Nigeria                                  |
| Pakistan | Haider            | Shirazi        | Co-PI                 | Neonatology Department, Pakistan Institute of Medical Sciences                 |
| Pakistan | Adil              | Muhammad       | laboratory            | Department of Microbiology, Quaid-i-Azam University, Islamabad 45320, Pakistan |
| Pakistan | Rabaab            | Zahra          | PI                    | Department of Microbiology, Quaid-i-Azam University, Islamabad 45320, Pakistan |
| Pakistan | Syed Najeeb       | Ullah          | scientist             | Department of Microbiology, Quaid-i-Azam University, Islamabad 45320, Pakistan |
| Pakistan | Muhammad          | Hilal Jan      | project manager       | Department of Microbiology, Quaid-i-Azam University, Islamabad 45320, Pakistan |
| Pakistan | Rubina            | Kamran         | clinician             | Pakistan Institute of Medical Sciences                                         |
| Pakistan |                   | Sajana         | research nurse        | Pakistan Institute of Medical Sciences                                         |
| Pakistan | Jazba             | Saeed          | research nurse        | Pakistan Institute of Medical Sciences                                         |
| Pakistan | Noreen            | Maqsood        | research nurse        | Pakistan Institute of Medical Sciences                                         |
| Pakistan | Maria             | Zafar          | research nurse        | Pakistan Institute of Medical Sciences                                         |
| Pakistan | Saraeen           | Sadiq          | research nurse        | Pakistan Institute of Medical Sciences                                         |
| Pakistan | Sumble            | Ahsan          | research nurse        | Pakistan Institute of Medical Sciences                                         |
| Pakistan | Madiha            | Tariq          | scientist             | Pakistan Institute of Medical Sciences                                         |
| Pakistan | Sidra             | Sajid          | scientist             | Pakistan Institute of Medical Sciences                                         |
| Pakistan | Hasma             | Mustafa        | scientist             | Pakistan Institute of Medical Sciences                                         |
| Pakistan | Anees-ur          | Rehman         | local project manager | Pakistan Institute of Medical Sciences                                         |
| Pakistan | Atif              | Muhammad       | local project manager | Pakistan Institute of Medical Sciences                                         |
| Pakistan | Gahssan           | Mehmood        | local project manager | Pakistan Institute of Medical Sciences                                         |
| Pakistan | Mahnoor           | Nisar          | local project manager | Pakistan Institute of Medical Sciences                                         |
| Pakistan | Shermeen          | Akif           | local project manager | Pakistan Institute of Medical Sciences                                         |
| Pakistan | Tahira            | Yasmeen        | local project manager | Pakistan Institute of Medical Sciences                                         |
| Pakistan | Sabir             | Nawaz          | community coordinator | Pakistan Institute of Medical Sciences                                         |
| Pakistan | Anam Shanal       | Atta           | community coordinator | Pakistan Institute of Medical Sciences                                         |
| Pakistan | Mian              | Laiq-ur-Rehman | community coordinator | Pakistan Institute of Medical Sciences                                         |

|                 |            |               |                 |                                                                                                             |
|-----------------|------------|---------------|-----------------|-------------------------------------------------------------------------------------------------------------|
| Pakistan        | Robina     | Kousar        | community nurse | Pakistan Institute of Medical Sciences                                                                      |
| Pakistan        | Kaloom     | Bibi          | community nurse | Pakistan Institute of Medical Sciences                                                                      |
| Pakistan        | Kosar      | Waheed        | community nurse | Pakistan Institute of Medical Sciences                                                                      |
| Pakistan        | Zainab     | Majeed        | community nurse | Pakistan Institute of Medical Sciences                                                                      |
| Pakistan        | Ayesha     | Jalil         | data support    | Pakistan Institute of Medical Sciences                                                                      |
| Rwanda          | Espoir     | Kajibwami     | clinician       | Kabgayi Hospital, Kabgayi, Gitarama, Rwanda                                                                 |
| Rwanda          | Aniceth    | Rucogoza      | laboratory      | Microbiology Laboratory Director, National Reference Laboratory Rwanda.                                     |
| Rwanda          | Innocent   | Nzabahimana   | laboratory      | The University Teaching Hospital (CHUK), Kigali, Rwanda                                                     |
| Rwanda          | Mazarati   | Jean-Baptiste | PI              | Head of Biomedical Services National Reference Laboratory, Kigali Rwanda                                    |
| Rwanda          | Lucie      | Gaju          | project manager | The University Teaching Hospital (CHUK), Rwanda                                                             |
| Rwanda          | Kankundiye | Riziki        | nurse/scientist | The University Teaching Hospital (CHUK), Kigali, Rwanda                                                     |
| Rwanda          | Brigitte   | Uwamahoro     | nurse/scientist | The University Teaching Hospital (CHUK), Kigali, Rwanda                                                     |
| Rwanda          | Rachel     | Uwera         | nurse/scientist | The University Teaching Hospital (CHUK), Kigali, Rwanda                                                     |
| Rwanda          | Eugenie    | Nyiratuza     | nurse/scientist | The University Teaching Hospital (CHUK), Kigali, Rwanda                                                     |
| Rwanda          | Kumwami    | Muzungu       | nurse/scientist | The University Teaching Hospital (CHUK), Kigali, Rwanda                                                     |
| Rwanda          | Violette   | Uwitonze      | nurse/scientist | Kabgayi Hospital, Kabgayi, Gitarama, Rwanda                                                                 |
| Rwanda          | Marie C    | Horanimpundu  | nurse/scientist | Kabgayi Hospital, Kabgayi, Gitarama, Rwanda                                                                 |
| Rwanda          | Francine   | Nzeyimana     | nurse/scientist | Kabgayi Hospital, Kabgayi, Gitarama, Rwanda                                                                 |
| Rwanda          | Prince     | Mitima        | nurse/scientist | Kabgayi Hospital, Kabgayi, Gitarama, Rwanda                                                                 |
| South Africa    | Angela     | Dramowski     | clinician       | Department of Paediatrics and child health, Stellenbosch University, Stellenbosch, Cape Town                |
| South Africa    | Andrew     | Whitelaw      | Co-PI           | Division of Medical Microbiology, Stellenbosch University, Tygerberg Hospital, Cape Town                    |
| South Africa    | Lauren     | Paterson      | laboratory      | Division of Medical Microbiology, Stellenbosch University, Tygerberg Hospital, Cape Town                    |
| South Africa    | Mary       | Frans         | nurse           | Tygerberg Hospital, Cape Town                                                                               |
| South Africa    | Marvina    | Johnson       | nurse           | Tygerberg Hospital, Cape Town                                                                               |
| South Africa    | Eveline    | Swanepoel     | nurse           | Tygerberg Hospital, Cape Town                                                                               |
| South Africa    | Zoleka     | Bojana        | nurse           | Tygerberg Hospital, Cape Town                                                                               |
| South Africa    | Mieme      | du Preez      | nurse           | Tygerberg Hospital, Cape Town                                                                               |
| South Africa    | Shaheen    | Mehtar        | PI              | Faculty of Medicine and Health Sciences, Unit for Infection Prevention and Control, Stellenbosch University |
| South Africa    | Andre      | Bulabula      | scientist       | Faculty of Medicine and Health Sciences, Unit for Infection Prevention and Control, Stellenbosch University |
| The Netherlands | Feiyan     | Liu           | scientist       | Leiden Academic Centre for Drug Research, Leiden University, Leiden, The Netherlands                        |
| The Netherlands | Johan GC   | van Hasselt   | scientist       | Leiden Academic Centre for Drug Research, Leiden University, Leiden, The Netherlands                        |
| UK              | Timothy    | Walsh         | PI              | Institute of Infection and Immunity, School of Medicine, Cardiff University                                 |
| UK              | Kirsty     | Sands         | scientist       | Institute of Infection and Immunity, School of Medicine, Cardiff University                                 |
| UK              | Maria      | Carvalho      | scientist       | Institute of Infection and Immunity, School of Medicine, Cardiff University                                 |
| UK              | Rebecca    | Milton        | project manager | Institute of Infection and Immunity, School of Medicine, Cardiff University                                 |
| UK              | Kathryn    | Thomson       | scientist       | Institute of Infection and Immunity, School of Medicine, Cardiff University                                 |

|    |         |           |              |                                                                                                       |
|----|---------|-----------|--------------|-------------------------------------------------------------------------------------------------------|
| UK | Edward  | Portal    | scientist    | Institute of Infection and Immunity, School of Medicine, Cardiff University                           |
| UK | Jordan  | Mathias   | scientist    | Institute of Infection and Immunity, School of Medicine, Cardiff University                           |
| UK | Calie   | Dyer      | Data manager | Institute of Infection and Immunity, School of Medicine, Cardiff University                           |
| UK | Ana     | Ferreira  | scientist    | Institute of Infection and Immunity, School of Medicine, Cardiff University                           |
| UK | Robert  | Andrews   | scientist    | Institute of Infection and Immunity, School of Medicine, Cardiff University                           |
| UK | John    | Watkins   | scientist    | Institute of Infection and Immunity, School of Medicine, Cardiff University                           |
| UK | David   | Gillespie | scientist    | Centre for Trials Research, Cardiff University                                                        |
| UK | Kerry   | Hood      | Co-PI        | Centre for Trials Research, Cardiff University                                                        |
| UK | Katie   | Taiyai    | scientist    | Centre for Trials Research, Cardiff University                                                        |
| UK | Nigel   | Kirby     | scientist    | Centre for Trials Research, Cardiff University                                                        |
| UK | Maria   | Nieto     | scientist    | Institute of Infection and Immunity, School of Medicine, Cardiff University                           |
| UK | Thomas  | Hender    | scientist    | Institute of Infection and Immunity, School of Medicine, Cardiff University                           |
| UK | Patrick | Hogan     | scientist    | Institute of Infection and Immunity, School of Medicine, Cardiff University                           |
| UK | Habiba  | Saif      | scientist    | Institute of Infection and Immunity, School of Medicine, Cardiff University                           |
| UK | Brekhna | Hassan    | scientist    | Institute of Infection and Immunity, School of Medicine, Cardiff University                           |
| UK | Ellis   | Jones     | scientist    | Institute of Infection and Immunity, School of Medicine, Cardiff University                           |
| UK | Matthew | Barrell   | scientist    | Institute of Infection and Immunity, School of Medicine, Cardiff University                           |
| UK | Ian     | Boostrom  | scientist    | Institute of Infection and Immunity, School of Medicine, Cardiff University                           |
| UK | Francis | Frayne    | scientist    | Institute of Infection and Immunity, School of Medicine, Cardiff University                           |
| UK | Jessica | Rees      | scientist    | Institute of Infection and Immunity, School of Medicine, Cardiff University                           |
| UK | Lim     | Jones     | clinician    | Specialist Antimicrobial Chemotherapy Unit, Public Health Wales, Cardiff, UK                          |
| UK | Susanna | Dunachie  | scientist    | Centre for Tropical Medicine and Global Health, Nuffield Department of Medicine, University of Oxford |
| UK | Brad    | Spiller   | scientist    | Institute of Infection and Immunity, School of Medicine, Cardiff University                           |
| UK | Julian  | Parkhill  | scientist    | Cambridge Infectious Diseases, Department of Veterinary Medicine, Cambridge University                |
